# Supplementary material for: Simulating chronic wasting disease spread in California after the initial detection
Source: Research Square preprint supplement (doi:10.21203/rs.3.rs-8272477/v1), 2025-12-08
Supplement: Supplementary file 1 [file d4f1bd5b775fa3987238c496.pdf]

1 **Supplementary Information: Simulating chronic wasting disease**  
2 **spread in California after the initial detection**

3 Cesar Herraiz<sup>1,2</sup>, Carlos González-Crespo<sup>2\*</sup>, Brandon Munk<sup>3</sup>, Alexander Heeren<sup>3</sup>, Pelayo Acevedo<sup>1</sup>, Beatriz  
4 Martínez-López<sup>2</sup>

5 <sup>1</sup> Health and Biotechnology Research Group (SaBio), Institute for Game and Wildlife Research (IREC), CSIC-  
6 JCCM-UCLM, 13071 Ciudad Real, Spain

7 <sup>2</sup> Center for Animal Disease Modeling and Surveillance (CADMS), Department of Medicine & Epidemiology,  
8 School of Veterinary Medicine, University of California, Davis 95618 CA, USA

9 <sup>3</sup> California Department of Fish and Wildlife (CDFW), Wildlife Health Laboratory (WHL), Rancho Cordova,  
10 CA 95670, USA

11 \*Corresponding author:  
12 Carlos González-Crespo  
13 [cgonzalezcrespo@ucdavis.edu](mailto:cgonzalezcrespo@ucdavis.edu)

14 **Index**

|    |                                                                         |    |
|----|-------------------------------------------------------------------------|----|
| 15 | Appendix 1: ODD Protocol.....                                           | 3  |
| 16 | 1.1 Purpose.....                                                        | 3  |
| 17 | 1.2 Entities, state variables, and scales .....                         | 3  |
| 18 | 1.3 Process overview and scheduling .....                               | 4  |
| 19 | 1.4 Design concepts .....                                               | 6  |
| 20 | 1.4.1 Basic principles .....                                            | 6  |
| 21 | 1.4.2 Emergence.....                                                    | 7  |
| 22 | 1.4.3 Adaptation .....                                                  | 7  |
| 23 | 1.4.4 Sensing .....                                                     | 7  |
| 24 | 1.4.5 Interaction.....                                                  | 8  |
| 25 | 1.4.6 Stochasticity .....                                               | 8  |
| 26 | 1.4.7 Collectives.....                                                  | 8  |
| 27 | 1.5 Initialization .....                                                | 8  |
| 28 | 1.6 Input data.....                                                     | 13 |
| 29 | 1.7 Submodels.....                                                      | 13 |
| 30 | 1.7.1 Aging.....                                                        | 13 |
| 31 | 1.7.2 Natural mortality .....                                           | 14 |
| 32 | 1.7.3 Hunting mortality .....                                           | 14 |
| 33 | 1.7.4 CWD mortality .....                                               | 14 |
| 34 | 1.7.5 Carcass removal .....                                             | 15 |
| 35 | 1.7.6 Fawning.....                                                      | 15 |
| 36 | 1.7.7 Group dynamics .....                                              | 15 |
| 37 | 1.7.8 Dispersal.....                                                    | 16 |
| 38 | 1.7.9 Migration.....                                                    | 16 |
| 39 | 1.7.10 Carrying capacity dispersal .....                                | 16 |
| 40 | 1.7.11 CWD Force of infection .....                                     | 17 |
| 41 | 1.7.12 CWD Diffusion .....                                              | 19 |
| 42 | 1.7.13 Droughts .....                                                   | 20 |
| 43 | 1.7.14 Wildfires .....                                                  | 20 |
| 44 | Appendix 2: Model evaluation.....                                       | 21 |
| 45 | Appendix 3: Parameter optimization.....                                 | 24 |
| 46 | 3.1. Hunting pressure ( $k_{hunt}$ , $\theta_{hunt}$ ).....             | 24 |
| 47 | 3.2. Probability of visiting a carcass ( $\rho$ ).....                  | 25 |
| 48 | 3.3. Carcass duration in the environment ( $\tau$ ).....                | 25 |
| 49 | 3.4. Wildfire and big fire probability ( $firep$ and $bigfirep$ ) ..... | 28 |
| 50 | Appendix 4: Supplementary Figures.....                                  | 30 |
| 51 | References .....                                                        | 31 |

# 53 **Appendix 1: ODD Protocol**

## 54 **1.1 Purpose**

55 The purpose of the model is to simulate the spatiotemporal dynamics of CWD in mule deer in the state  
56 of California. To achieve this, the model comprises two main modules:

- 57 1. The ecological module, which pertains to the host, and whose purpose is to simulate the mule deer  
58 population in California over time and space, considering its response to both natural phenomena,  
59 such as fires or droughts, and anthropogenic factors, such as hunting. This module is comprised of  
60 two submodules. The first submodule pertains to the environment and encompasses data and  
61 processes such as habitat suitability, scavenging pressure, fires and droughts. The second submodule  
62 pertains to the host and includes demographic, social, and behavioral information about mule deer,  
63 such as natality and mortality, migrations and grouping patterns.
- 64 2. The epidemiological module, which is related to the pathogen, and whose purpose is to examine the  
65 spread of CWD over time in the mule deer population. This module interacts with the ecological  
66 one. The evolution of the deer population affects the pathogen spread, which in turn affects the  
67 population by causing mortality.

## 68 **1.2 Entities, state variables, and scales**

69 The model comprises three agents as entities: deer, carcass, and grid cells. The discretization of the  
70 space into grid cell agents allows some processes to be programmed at the cell level, thereby reducing the  
71 computational cost and increasing the ability to apply a complex model to large scales.

72 Each deer is defined by 14 state variables related to location, age, sex, fawning, grouping, migratory  
73 behavior, and CWD infection status. When an infected deer dies, it becomes a carcass agent, with the location  
74 and the days of persistence in the environment as state variables. Grid cells have 9 state variables related to  
75 habitat suitability, carrying capacity ( $K$ ), deer range (year-round, winter, summer, or out of the range), deer  
76 abundance ( $N$ ), infectious deer carcass abundance, CWD prevalence, scavenging pressure, hunting pressure and

77 whether the cell has been damaged by fire. The entities included in the model and their state variables are shown  
78 in Table S1.

79 The spatial extent of the grid encompasses the California state, being each grid cell a 10 km x 10 km  
80 size square (100 km<sup>2</sup>). The model has a daily time step, starting in the middle of the summer (day = 213; August  
81 1<sup>st</sup>).

82 **Table S1.** Entities and their states variables included in the simulation.

| Entity           | State variable      | Description                                                                       |
|------------------|---------------------|-----------------------------------------------------------------------------------|
| <b>Deer</b>      | <i>cell</i>         | id of the grid cell in which deer is located                                      |
|                  | <i>residence</i>    | id of the grid cell where deer resides                                            |
|                  | <i>sex</i>          | 1 for male and 0 for female                                                       |
|                  | <i>age</i>          | Age in days                                                                       |
|                  | <i>class</i>        | 1 if fawn, 2 if yearling, 3 if adult, 4 if old                                    |
|                  | <i>fawning</i>      | 1 if pregnant female, 0 otherwise                                                 |
|                  | <i>mother</i>       | id of the mother                                                                  |
|                  | <i>group</i>        | id of the group to which it belongs                                               |
|                  | <i>solitary</i>     | 1 if solitary, 0 otherwise                                                        |
|                  | <i>migratory</i>    | 1 if it belongs to a migratory population, 0 otherwise                            |
|                  | <i>susceptible</i>  | 1 if uninfected, 0 otherwise                                                      |
|                  | <i>exposed</i>      | 1 if infected but not infectious, 0 otherwise                                     |
|                  | <i>infected</i>     | 1 if infected and infectious, 0 otherwise                                         |
|                  | <i>clinical</i>     | 1 if infected with clinical signs, 0 otherwise                                    |
| <b>Carcass</b>   | <i>loc</i>          | id of the grid cell in which the deer infectious carcass is located               |
|                  | <i>removal</i>      | Number of days the carcass remains in the environment                             |
| <b>Grid cell</b> | <i>N</i>            | Mule deer abundance                                                               |
|                  | <i>migra</i>        | Mule deer range: 1 if summer range, 2 winter range, 3 if year-round, -1 otherwise |
|                  | <i>K</i>            | Number of mule deer that the grid cell can shelter                                |
|                  | <i>weight</i>       | Cell resistance                                                                   |
|                  | <i>huntpressure</i> | Proportion of the population annually harvested                                   |
|                  | <i>prevalence</i>   | CWD prevalence in the cell                                                        |
|                  | <i>ncarcass</i>     | Number of deer infectious carcasses in the cell                                   |
|                  | <i>scavengers</i>   | 1 to 5 depending on the number of present scavengers' species                     |
|                  | <i>daysburnt</i>    | Days elapsed since the cell was burnt                                             |

### 83 1.3 Process overview and scheduling

84 Processes referred to the deer agent in the model are related to: 1) mule deer population dynamics; and  
85 2) CWD disease dynamics in the mule deer population. Population dynamics processes include aging, natural  
86 mortality, hunting mortality, fawning, seasonal group dynamics, yearling dispersal, and seasonal migrations.

87 The CWD disease dynamics processes include pathogen transmission or exposition and CWD-induced  
88 mortality.

89 Processes related with the mule deer population dynamics are scheduled as follows (Ahlborn & White  
90 2006; Mejia-Salazar *et al.* 2017; Monteith *et al.* 2011): On December 16<sup>th</sup> (day = 350) early gestation (EG)  
91 starts, and large mixed groups are formed. On April 1<sup>st</sup> (day = 91) late gestation (LG) period starts, during which  
92 males separate from females and young individuals. Departure from winter range areas to summer range (spring  
93 migration) begin in middle April (day = 105). Fawning (F) starts on May 16<sup>th</sup> (day = 136), resulting in the  
94 formation of the smallest groups of the year. Females go apart for giving birth, while fawns from the previous  
95 year separate from their mothers' group and disperse. On August 1<sup>st</sup> (day = 213) pre-rut (PR) period begins, and  
96 males start joining females with fawns. Females without fawns remain in small groups. Hunting mortality occurs  
97 between August 14<sup>th</sup> (day = 226) and November 7<sup>th</sup> (day = 311). Fall migration commences in mid-October (day  
98 = 288). Rut (R) period begins on November 1<sup>st</sup> (day = 305). Aging and natural mortality occur every step. The  
99 day starts from 0 (1<sup>st</sup> January) after it reaches 365 (31<sup>st</sup> December).

100 With regard to the CWD processes scheduling, prion shedding commences 6 to 9 months (180 to 270  
101 days) after infection (Plummer *et al.* 2017; Tamguney *et al.* 2009), thereby enabling direct transmission and  
102 environmental deposition. Clinical signs manifest approximately 490 days after infection (Johnson *et al.* 2011;  
103 Williams 2005). Death by disease takes place 14 to 120 days after the onset of clinical signs (Williams 2005).  
104 Following death, infected deer become a carcass agent, which remains infectious (Miller *et al.* 2004). The only  
105 process considered for the carcasses is their disappearance. The time carcasses remain in the environment  
106 depends on the season and scavenging pressure (Jennelle *et al.* 2009).

107 The processes referred to the grid cells are droughts, wildfires, and the diffusion of CWD across  
108 neighboring cells. Drought has a given probability of occurring at the start of the simulation and can last for a  
109 number of days derived from a uniform distribution between 365 and 1460 days (1 to 4 years; Miller *et al.* 2022).  
110 During the summer months, wildfires may occur in cells with a certain probability, affecting carrying capacity  
111 (Bristow *et al.* 2020; Sparks *et al.* 2018).

## 112 1.4 Design concepts

### 113 1.4.1 Basic principles

114 Density dependence in mule deer was assumed to be related with the carrying capacity in the winter  
115 range, which entails an effect on fawn survival in winter but not on adult survival (Bergman *et al.* 2015). The  
116 buck:doe ratio was considered not to affect the birth rates since no severe decline in productivity was found as  
117 a response to the sex ratio (White *et al.* 2001). Predation, primarily by coyote (*Canis latrans*) and mountain lion  
118 (*Puma concolor*), could influence mortality rates in the overall population, particularly in fawns. However,  
119 several studies have shown changes in predator communities entailing compensatory effects, leading to the  
120 absence of changes in population trends (for further information, see Forrester & Wittmer 2013). Therefore, no  
121 changes in mule deer demography based on predator community composition were assumed in the model.

122 This model assumes that CWD can be transmitted through direct animal contact or through the  
123 environmental presence of the prion, either in the soil or in an infectious carcass (Miller, Hobbs & Taverer  
124 2006). Furthermore, it assumes a CWD diffusion process from where the outbreak originates (Jennelle *et al.*  
125 2014). Vertical transmission was omitted in the model since it is unusual (Miller & Williams 2003) and seems  
126 no to have an effect on the disease dynamics (Potapov *et al.* 2013). In addition to mortality due to CWD, the  
127 model assumes an increase in mortality of infected deer due to greater susceptibility to predation, vehicle kill,  
128 dehydration, or hypothermia during winter months (Miller *et al.* 2008; Otero *et al.* 2021).

129 Long-range movements may also play an important role in the spread of the pathogen to farer areas  
130 (Diefenbach *et al.* 2008; Garlick *et al.* 2014). Therefore, dispersal and migration were incorporated into the  
131 model. Mule deer populations in California can be resident or migratory (Ahlborn & White 2006). Resident  
132 populations were assumed to remain in the same cell throughout the year, while migratory populations were  
133 assumed to move entirely from summer to winter range cells in fall migration, returning to the cell where they  
134 were born in spring migration (van de Kerk *et al.* 2021). Dispersion is carried out by yearlings, mainly males  
135 but also females (Robinette 1966), Displacements can occur in any direction within the range (Hamlin & Mackie  
136 1989). Cells selected for migratory displacements were assumed to depend on habitat suitability, slope, and its  
137 traditional use as migratory corridors. Upon reaching the target cell, the probability of the deer remaining in that

138 cell or moving on to another suitable cell is assumed to depend on the  $N$  and  $K$  values of the cell, leading to  
139 dispersion towards another cell when  $N$  approaches  $K$ .

140 The model assumes that drought leads to an increase in mortality and in the probability of wildfires  
141 (Jackson *et al.* 2021; Littell *et al.* 2016; Schuyler, Dugger & Jackson 2018). With regard to wildfires, it is  
142 assumed that when they occur, the environmental prion load of the cell is eliminated (Lee 2023). Moreover, it  
143 is postulated that wildfires have an effect on the cell's  $K$ , reducing it to a minimum during the first year after the  
144 fire and almost doubling during the second year, then stabilizing over the next three years (Bristow *et al.* 2020;  
145 Sparks *et al.* 2018).

#### 146 **1.4.2 Emergence**

147 The CWD spread emerges from the model based on the mule deer population, grouping and movement  
148 patterns, and on transmission dynamics. Mule deer mortality is also influenced by population abundance and  
149 CWD prevalence rates, so mule deer population dynamics itself also emerges from the model.

#### 150 **1.4.3 Adaptation**

151 The mule deer adapt their behavior based on  $N$  and  $K$ . When  $N$  approaches  $K$ , either due to an increase  
152 in population or a sharp reduction in  $K$  as a result of a wildfire, the mule deer disperse to other cells that have  
153 the capacity to accommodate them.

#### 154 **1.4.4 Sensing**

155 The mule deer agents sense the state variables of the grid cell agents, which influence the probability of  
156 being hunted, the destination and movement cells for migratory and dispersal movements, and the probability  
157 of infection through environmental prion load or the presence of infectious carcasses. Conversely, grid cells also  
158 sense mule deer agents, as they sense the number of deer they contain and how many of them are infected, thus  
159 determining  $N$ , the prevalence of CWD, and the prion load. Moreover, they also sense the presence of infectious  
160 carcass agents. Finally, there is also sensing among the mule deer agents themselves, which determines group  
161 dynamics and transmission within them, and among the grid cell agents themselves, determining the spread of  
162 fires or the diffusion of the pathogen between cells.

#### 163 **1.4.5 Interaction**

164 Deer agents can interact being able to entail pathogen transmission if one of them is infected and the  
165 other one is not. Deer agents can interact with infected deer carcasses agents being able to acquire the pathogen  
166 if they are not infected. Deer agents also interact with the grid cell agents, as the prion load of each cell is  
167 determined by infected deer that are or have been in it. This prion load can, in turn, lead to the infection.  
168 Additionally, grid cell agents interact with each other, as the CWD diffusion process considers new infection in  
169 a cell based on the prevalence of neighboring cells.

#### 170 **1.4.6 Stochasticity**

171 Natality (i.e., the number of offspring per female and the occurrence of twins, as well as the sex of the  
172 offspring), mortality (both natural and hunting-related mortality), and dispersal, are based on probabilities that  
173 affect each individual, and therefore are stochastic processes. Hunting is also a stochastic process since hunting  
174 pressure is defined by a Gamma distribution. These demographic processes condition mule deer abundance,  
175 having an effect on cell selection during migration and thus making this process also stochastic. Moreover, the  
176 day on which each individual migrates is also stochastic, conditioning the abundance on the target cell at the  
177 time of its arrival, and therefore influencing cell selection. Group dynamics is also a stochastic process in which  
178 size is provided as a range and the members are randomly selected based on the size and sex and age ratios for  
179 each season. All transmission processes and durations of each infection status are stochastic as they are based  
180 on probabilities and variable time intervals. Drought has a probability of occurring at the beginning of the  
181 simulation, and its duration is variable. Each cell has a certain probability of being burnt by a wildfire each  
182 summer.

#### 183 **1.4.7 Collectives**

184 Deer agents are organized in social groups that fluctuate in size and sex and age ratios seasonally. The  
185 transmission processes of CWD differ within and outside of these groups.

### 186 **1.5 Initialization**

187 The initial sex and age ratios of the mule deer population are shown in Table S2. All deer are initially  
188 susceptible to infection. The outbreak initiates with the infection of an adult male, based on observed infection  
189 rates (Miller & Conner 2005; Osnas *et al.* 2009). The location and start date of the outbreak can be selected for



190 each simulation. Mule deer demographic and epidemiological parameters employed for the simulation are  
191 described in Tables 3 and 4, respectively.

192 **Table S2.** Initial proportion of the population by sex and age based on Furnas *et al.* (2018); Rittenhouse, Mong and Hart  
193 (2015); Wood *et al.* (1989).

| Initial proportion of the population |      |
|--------------------------------------|------|
| Fawn male (0 - 1 year)               | 0.17 |
| Fawn female (0 - 1 year)             | 0.17 |
| Yearling male (1 - 2 years)          | 0.11 |
| Yearling female (1 - 2 years)        | 0.14 |
| Adult male (2 - 9 years)             | 0.09 |
| Adult female (2 - 11 years)          | 0.25 |
| Old male (9 - 12 years)              | 0.02 |
| Old female (11 - 16 years)           | 0.05 |

**Table S3.** Mule deer demographic parameters. PR is the pre-rut period, R is the rut period, EG is the early gestation period, LG is the late gestation period, and F is the fawning period.

| Parameter               | Description                                                                                                     | Value                                                               | Source                                                                                              |
|-------------------------|-----------------------------------------------------------------------------------------------------------------|---------------------------------------------------------------------|-----------------------------------------------------------------------------------------------------|
| <i>preg</i>             | Proportion of females that get pregnant (yearling; adult; old)                                                  | 0.6; 0.87; 0.8                                                      | Bender and Hoenes (2018); Monteith <i>et al.</i> (2014); Taylor (1996)                              |
| <i>fawnsex</i>          | male:female sex ratio at parturition                                                                            | 1:1                                                                 | Taylor (1996)                                                                                       |
| <i>twinp</i>            | Twin probability given pregnancy (yearling; adult; old)                                                         | 0.07; 0.87; 0.29                                                    | Bender and Hoenes (2018); Bishop <i>et al.</i> (2010); Monteith <i>et al.</i> (2014); Taylor (1996) |
| <i>fawnsurv</i>         | Fawn survival rate (F and PR; other seasons)                                                                    | 0.44; 0.61                                                          | Forrester and Wittmer (2013)                                                                        |
| <i>starv</i>            | Fawn survival to starvation rate                                                                                | Eq. 3                                                               | Adapted from Potapov <i>et al.</i> (2013)                                                           |
| <i>survf</i>            | Yearling and adult female deer survival rate                                                                    | 0.85                                                                | Forrester and Wittmer (2013)                                                                        |
| <i>survm</i>            | Yearling and adult male deer survival rate                                                                      | 0.78                                                                | Bishop <i>et al.</i> (2005); Forrester and Wittmer (2013)                                           |
| <i>oldsurv</i>          | Old deer survival rate (male; female)                                                                           | Eq. 4; Eq. 5                                                        | Gross and Miller (2001)                                                                             |
| <i>k<sub>hunt</sub></i> | Shape parameter of gamma function for hunting pressure (adult/old male; adult/old female; yearling male; other) | 12.325; 12.327; 12.331; 0                                           | Numerically optimized from CDFW harvest statistics                                                  |
| <i>θ<sub>hunt</sub></i> | Scale parameter of gamma function for hunting pressure (adult/old male; adult/old female; yearling male; other) | $1.6 \cdot 10^{-2}$ ; $1.3 \cdot 10^{-4}$ ; $1.6 \cdot 10^{-5}$ ; 0 |                                                                                                     |
| <i>cwdmort</i>          | Mortality rate associated with CWD infection (F and PR; other seasons)                                          | 0.11; 0.32                                                          | Miller <i>et al.</i> (2008)                                                                         |
| <i>cwdsol</i>           | Probability of becoming solitary when clinical CWD starts                                                       | 0.64                                                                | Mejia Salazar <i>et al.</i> , 2016)                                                                 |
| <i>grmixed</i>          | Mixed group size (EG; PR and R)                                                                                 | 8 – 11; 4 - 7                                                       | Mejia Salazar <i>et al.</i> (2016)                                                                  |
| <i>grdoe</i>            | Doe group size (EG; F, PR and R)                                                                                | 4 – 6; 2 - 5;                                                       | Mejia Salazar <i>et al.</i> (2016)                                                                  |
| <i>grbuck</i>           | Buck group size (LG; F)                                                                                         | 3 – 6; 3 - 4                                                        | Mejia Salazar <i>et al.</i> (2016)                                                                  |
| <i>gryearling</i>       | Yearling group size (F)                                                                                         | 2 - 4                                                               | Mejia Salazar <i>et al.</i> (2016)                                                                  |
| <i>disp</i>             | Probability for a yearling to disperse (male; female)                                                           | 0.6; 0.35                                                           | Robinette (1966)                                                                                    |
| <i>disprange</i>        | Max. number of cells a deer can move for dispersion                                                             | 4                                                                   | Hamlin and Mackie (1989)                                                                            |
| <i>migrange</i>         | Max. number of cells a deer can move for migration                                                              | 10                                                                  | Mackie (1998)                                                                                       |
| <i>speed</i>            | Displacement speed (in km/day)                                                                                  | 16                                                                  | Lendrum <i>et al.</i> (2013)                                                                        |

| Param<br>eter                                        | Description                                                                                 | Value                  | Source                                                               |
|------------------------------------------------------|---------------------------------------------------------------------------------------------|------------------------|----------------------------------------------------------------------|
| $\beta$                                              | Within group transmission rate                                                              | 0.85                   | Jennelle <i>et al.</i> (2014); Potapov <i>et al.</i> (2013)          |
| $\beta'$                                             | Environmental transmission rate                                                             | $2 \cdot 10^{-4}$      | Jennelle <i>et al.</i> (2014)                                        |
| $\beta_c$                                            | Probability of transmission from carcass given a contact                                    | 0.037                  | Miller <i>et al.</i> (2004)                                          |
| $\lambda, \lambda_G, \lambda_E, \lambda_C$           | Probability of being infected each step (total; from group; from environment; from carcass) | Eq. 9-16               | Based on Jennelle <i>et al.</i> (2009); Potapov <i>et al.</i> (2013) |
| $\delta_{ff}, \delta_{fm}, \delta_{mf}, \delta_{mm}$ | Interaction rate (female-female; female-male; male-female; male-male)                       | 0.52; 1.04; 0.52; 1.91 | Mejia Salazar (2017)                                                 |
| $\varphi_f, \varphi_m, \varphi_{fa}$                 | Food consumption rate (female, male, fawn)                                                  | 0.93; 0.88; 1.19       | Potapov <i>et al.</i> (2013)                                         |
| $\rho$                                               | Probability of visiting a carcass each step                                                 | $1.6 \cdot 10^{-4}$    | Numerically optimized from Jennelle <i>et al.</i> (2009)             |
| $I_{fgr}, I_{mgr}, I_{fagr}$                         | Number of infected deer within the group (females, males, fawns)                            |                        | Model output                                                         |
| $I_{365cell}$                                        | Number of infected deer that have been in the grid cell in the last 365 days                |                        | Model output                                                         |
| $N_{fgr}, N_{mgr}, N_{fagr}$                         | Number of deer within the group (females, males, fawns)                                     |                        | Model output                                                         |
| $N_{carcass}$                                        | Number of carcasses in the grid cell                                                        |                        | Model output                                                         |
| $\tau$                                               | Days of carcass persistence in the environment                                              | Eq. 6-8                | Numerically optimized from Jennelle <i>et al.</i> (2009)             |
| $d_i$                                                | Number of days an infected deer $i$ has spent in the grid cell                              |                        | Model output                                                         |
| $\beta_{dif}$                                        | Probability of CWD diffusion to a neighboring cell                                          | Eq. 17                 | Model output                                                         |

197 The California Department of Fish and Wildlife (CDFW) provided the proportional distribution of mule  
198 deer across spatial cells (CDFW, unpublished data). The initial mule deer abundance in the model (N) was  
199 calculated by multiplying this proportion by a statewide population estimate, allowing the total abundance to be  
200 adjusted for computational efficiency and enabling exploration of different overall deer density scenarios while  
201 preserving the underlying spatial pattern of relative distribution. The type of range for each cell (summer range,  
202 winter range, or year-round range) was also provided by the CDFW (see Figure S1). The  $K$  was considered to  
203 be associated with the habitat suitability (Muñoz *et al.* 2015). Therefore, a habitat suitability ( $hs$ ) value for each  
204 cell was calculated from land cover based on the Stanke *et al.* (2018) classification. Given the set of grid cells

205  $n$ , which comprises the overall state of California, the  $K$  of a given grid cell  $i$  was calculated by considering the  
 206 maximum  $N$  of the set of cells  $n$  and the habitat suitability ( $hs$ ) as follows:

$$K_i = hs_i \cdot \max \{N_n\} \quad (1)$$

207 The CDFW provided data on migratory corridors based on animals collared with GPS transmitters in  
 208 various populations across the state. These data classified the areas used as migratory corridors by each  
 209 population into three categories: standard (used by between 0 and 10% of the marked animals in that population),  
 210 moderate (between 10 and 20%), and high use (more than 20%). We assigned to these areas the coefficients 1.1,  
 211 1.2 and 1.3, respectively, while the remaining portion of the State was assigned a value of 1. For each grid cell,  
 212 we pondered the values by surface to obtain a parameter of use as migratory corridor ( $corr$ ). This parameter was  
 213 then combined with the  $hs$  parameter and the average terrain slope ( $slope$ ) to assign a resistance value to each  
 214 cell (state variable  $weight$ ) using the following formula:

$$weight_i = (1 - hf_i) \cdot 50 + slope_i / corr_i \quad (2)$$

215 A  $weight$  value ranging from 0 to 100 is obtained for each cell. The higher the  $weight$ , the greater the  
 216 resistance of the cell to the movement and residence of the mule deer. The objective of this approach is to  
 217 encourage the majority of the deer to migrate along the same cells, thereby forming migratory corridors  
 218 (Monteith *et al.* 2018), and to aggregate them in the most favorable areas during the winter months (D'Eon &  
 219 Serrouya 2005).

220 **Table S5.** Drought and wildfire related parameters employed in the model.

| Parameter       | Description                                                 | Value  | Source                                  |
|-----------------|-------------------------------------------------------------|--------|-----------------------------------------|
| <i>droughtp</i> | Drought probability each year                               | 0.2    | Mount, Escrive-Bou and Sencan (2021)    |
| <i>firep</i>    | Wildfire probability in a given cell each year              | 0.015  | Numerically optimized from CALFIRE data |
| <i>bigfirep</i> | Probability for a wildfire of burning the neighboring cells | 0.0028 | Numerically optimized from CALFIRE data |

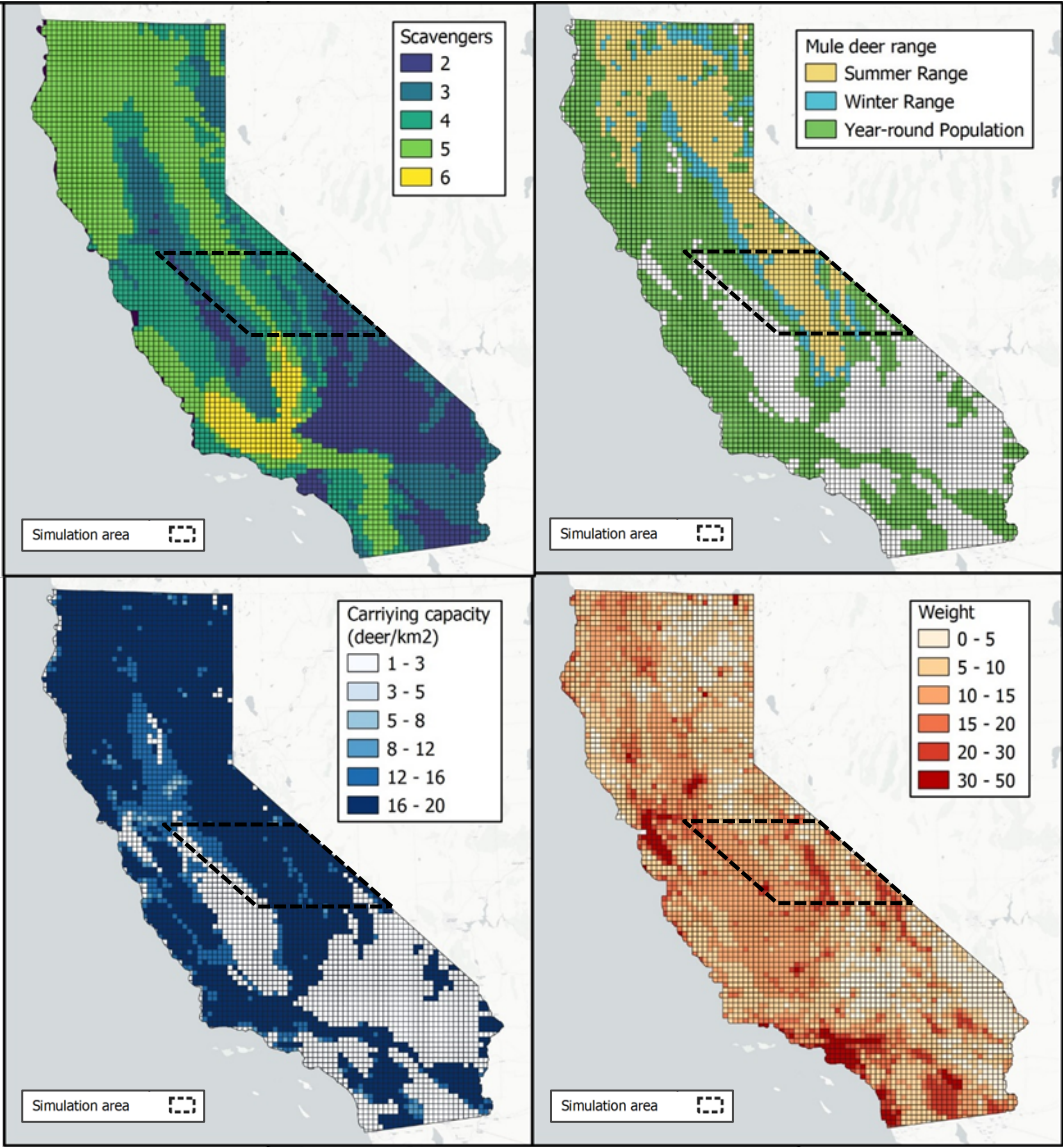

222

223 **Figure S1.** Initial values of the state variables of the grid cell agents utilized in the simulation, with the black-dashed line  
224 representing the boundaries of the simulation area.

225 **1.6 Input data**

226 The model does not use input data to represent time varying processes.

227 **1.7 Submodels**

228 **1.7.1 Aging**

229 Every step each deer agent increases the *age* value by 1 day. The state variable *class* changes from 1  
230 (fawns) to 2 (yearlings) when *age* = 366 days (1 year), to 3 (adult) when *age* = 731 days (2 years), and to 4 (old)  
231 when *age* = 3286 days (9 years) for males and *age* = 4016 days (11 years) for females.

### 232 1.7.2 Natural mortality

233 Natural mortality occurs every step. The survival of fawns during the winter months was considered to  
234 be affected by starvation in cases where the abundance of deer is higher than the 85% of the  $K$  (Bergman *et al.*  
235 2015). We employed a simple survival to starvation index ( $starv$ ) based on Potapov *et al.* (2013):

$$starv = \min\left\{1, \quad 0.85 \cdot K/N\right\} \quad (3)$$

236 Consequently, the survival rate of yearlings and adults is determined by the  $surv$  parameter. For fawns,  
237 it results from the product of  $fawnsurv$  and  $starv$  parameters. For old deer, it is estimated as a linear decline from  
238 the  $surv$  value to 0 at the maximum age (Gross & Miller 2001), resulting in the following equations for males  
239 and females, respectively:

$$oldsurv_m = -0.29 \cdot age/365 - 3.4 \quad (4)$$

$$oldsurv_f = -0.17 \cdot age/365 - 2.72 \quad (5)$$

### 240 1.7.3 Hunting mortality

241 Hunting mortality occurs every step during the hunting season. The hunting pressure is calculated for  
242 each cell, age group, and sex at the beginning of each hunting season. The probability of an individual being  
243 hunted during the season is obtained by randomly sampling from a gamma distribution  $\Gamma(k_{hunt}, \theta_{hunt})$ . This  
244 probability is then divided over the 85 days of the hunting season to obtain the probability of being hunted at  
245 each step.

### 246 1.7.4 CWD mortality

247 Miller *et al.* (2008) observed that deer infected with CWD were more susceptible to death from causes  
248 not directly related to the disease, such as hypothermia or predation. In their study, the diagnosis of CWD was  
249 performed using immunohistochemical staining, which allows for the preclinical detection of CWD in mule deer  
250 between 6 and 12 months after infection (Haley *et al.* 2012). Given that prion shedding commences 6-9 post-  
251 infection (Plummer *et al.* 2017; Tamguney *et al.* 2009), we considered an increase of  $cwdmort$  in mortality for  
252 infectious deer. All infected deer die 504 to 610 days after infection (Johnson *et al.* 2011; Williams 2005).

### 253 1.7.5 Carcass removal

254 When a deer infected with CWD dies, its carcass remains infectious in the environment until it  
255 decomposes or is consumed as carrion (Miller *et al.* 2004). Jennelle *et al.* (2009) assessed the persistence of deer  
256 carcasses in the environment concluding that season and scavenging pressure are the primary determinants. We  
257 used the data collected in their research to estimate de carcass survival ( $\tau$ ) for the four scheduled seasons  
258 considering the number of main scavenger species present (*scvg*):

$$\tau_{PR \text{ and } R} = 33.78^{-0.27 \cdot scvg} \quad (6)$$

$$\tau_{EG} = 63.24^{-0.06 \cdot scvg} \quad (7)$$

$$\tau_{LG \text{ and } F} = 71.21^{-0.24 \cdot scvg} \quad (8)$$

259 Black bear (*Ursus americanus*), mountain lion (*Puma concolor*), coyote (*Canis latrans*), California  
260 condor (*Gymnogyps californianus*), turkey vulture (*Cathartes aura*), and the feral pig (*Sus scrofa*) were  
261 considered as potential scavengers of mule deer carcasses (Allen *et al.* 2015; 2021; Bauer *et al.* 2005; Jennelle  
262 *et al.* 2009). The information about the presence of these species was provided by the CDFW.

### 263 1.7.6 Fawning

264 During EG season, each female deer older than 548 days (1.5 years) has *preg* probability of fawning. In  
265 case of fawning, it has *twinp* probability of giving birth to twins. Sex ratio at birth is determined by the *fawnsex*  
266 parameter.

### 267 1.7.7 Group dynamics

268 During PR and R periods, females without fawns are in groups of size *grdoe*, and males are in mixed  
269 groups of size *grmixed* with females and fawns. At the beginning of EG, small doe groups and mixed groups  
270 join together to form larger groups of sizes *grdoe* and *grmixed*, respectively. In LG period, adult and old males  
271 leave the mixed groups to form male groups of size *grbuck*. During F season, pregnant females separate and  
272 give birth, forming groups with their fawns. Yearlings separate and form their own groups of size *gryearling*.  
273 When the yearly cycle comes to an end and the PR period begins again, male and yearling groups join females  
274 with fawns forming mixed groups of size *grmixed*, and females without fawns remain in groups of size *grdoe*.

### 275 1.7.8 Dispersal

276 When the time comes for dispersal, each yearling deer has *disp* probability for dispersion. If  $N \geq 0.7 \cdot K$   
277 in the grid cell where the deer is located, the probability of dispersal is 1. When a deer disperses, it moves to the  
278 nearest grid cell in which  $N \leq 0.7 \cdot K$  in a *disprange* range of cells around its starting grid cell. Cells outside the  
279 summer or year-round range are discarded. If there are no cells in *disprange* that meet the aforementioned  
280 conditions, the deer will move to the cell with the least *weight* in *disprange*. Movements were assumed to follow  
281 the principle of least effort (Zipf 1949), which means that displacements occur through the cells with a lower  
282 *weight* value. The speed of movement is determined by the *speed* parameter.

### 283 1.7.9 Migration

284 As the fall migration period begins, all migratory deer move from their cells in the summer range to a  
285 randomly selected cell in the winter range that meets  $N \leq 0.8 \cdot K$  within a *migrrange* range of cells around its  
286 starting grid cell. Therefore, they do not necessarily migrate to the same area every year (van de Kerk *et al.*  
287 2021). Migrations occur in groups (Shellard & Mayor 2020), with all deer belonging to the same group migrating  
288 to the same cell. If there are no cells in a *migrrange* distance that meet this condition, the deer will move to the  
289 cell with the least *weight* in the winter range in a the *migrrange* range of cells. In spring migration, all migratory  
290 deer moves from its cell in the winter range to the cell where it was located before fall migration. Displacements  
291 occur through the cells with the lower *weight* values at a speed determined by the *speed* parameter.

### 292 1.7.10 Carrying capacity dispersal

293 The model assumes that when  $N > 0.9 \cdot K$  in a cell, a dispersal process begins as a result of intraspecific  
294 competition for available resources (Valente *et al.* 2020). In a cell where this condition is met, the probability  
295 of a deer leaving the cell at each step ( $P_k$ ) is determined as follows:

$$P_k = \frac{0.1 \cdot (N - 0.9 \cdot K)}{0.9 \cdot K} \quad (9)$$

296 This process causes the population to fluctuate slightly around the  $K$  of the cell. When a deer leaves the  
297 cell, it moves to the nearest grid cell where  $N \leq 0.7 \cdot K$  in a *disprange* range of cells around its starting grid cell.  
298 The target cell must belong to the same seasonal range as the starting cell (summer or winter) or be a year-round  
299 range cell. If there are no cells in *disprange* that meet these conditions, it moves to the cell with the least *weight*



300 in *disprange*. The deer move through the cells with the lower *weight* value at a speed determined by the *speed*  
301 parameter.

### 302 **1.7.11 CWD Force of infection**

303 CWD transmission may be frequency-dependent (FD) density-dependent (DD), or a combination of  
304 both (Gear *et al.* 2010; Jennelle *et al.* 2014; Storm *et al.* 2013; Winter & Escobar 2020). FD within-group  
305 transmission is considered to be the main mechanism of CWD transmission (Potapov *et al.* 2013; 2016; Storm  
306 *et al.* 2013). However, intergroup environmental transmission, which is a DD mechanism, has been shown to  
307 play a role in the disease dynamics, especially after a long period of time when the disease becomes endemic  
308 (Almberg *et al.* 2011; Miller, Hobbs & Tavener 2006). Therefore, we considered both within-group transmission  
309 and environmental transmission between groups, excluding FD transmission between groups since direct  
310 contacts between groups are rare and the likelihood of infection from a single contact is low (Belsare & Stewart  
311 2020; Habib *et al.* 2011; Kjaer 2010). We also considered the possibility of transmission from an infectious  
312 carcass (Miller *et al.* 2004). Thus, the probability of becoming infected at each step for a given individual is  
313 determined by the probability of becoming infected by another individual of the same group ( $\lambda_G$ ), the probability  
314 of becoming infected by the environment ( $\lambda_E$ ), and the probability of becoming infected by an infectious carcass  
315 ( $\lambda_C$ ).

#### 316 **1.7.11.1 Transmission rates ( $\beta$ and $\beta'$ )**

317 Actual values of transmission rates for mule deer in California are not available, although estimates  
318 have been made for other populations and species have been carried out (Almberg *et al.* 2011; Jennelle *et al.*  
319 2014; Miller, Hobbs & Tavener 2006; Potapov *et al.* 2016; Wasserberg *et al.* 2009). CWD prevalence rates in  
320 males can be up to twice as high as in females, and lower in yearlings (Edmunds *et al.* 2016; Heisey *et al.* 2010;  
321 Osnas *et al.* 2009), leading Jennelle *et al.* (2014) to suggest a different transmission rate for males and females  
322 as the most plausible option in their study of white-tailed deer (*Odocoileus virginianus*). However, higher  
323 prevalence in males and adults is likely associated with consumption and interaction behavior (Potapov *et al.*  
324 2013), which may vary between species. Consequently, we decided to use sex-independent transmission rates  
325 of  $\beta = 0.85 \text{ infections} \cdot \text{year}^{-1}$  (Jennelle *et al.* 2014; Potapov *et al.* 2016) for within-group transmission and  $\beta' =$

326  $2 \cdot 10^{-4}$  infections $\cdot$ year $^{-1}$  $\cdot$ individual $^{-1}$  (Jennelle *et al.* 2014) for environmental transmission, and combine them  
 327 with parameters related to food consumption and interaction rates.

### 328 **1.7.11.2 Probability of group infection ( $\lambda_G$ )**

329 For the within-group transmission, we included a parameter related to interaction rates ( $\delta$ ), with higher  
 330 values assigned to males than to females and fawns (Mejia Salazar 2017). The probability of an individual being  
 331 infected by a group member each time step for females ( $f$ ), males ( $m$ ) and fawns ( $fa$ ) is calculated as follows:

$$\lambda_{Gf} = \beta/365 \cdot \delta_{mf} \cdot \frac{I_{mgr}}{N_{mgr}} + \beta/365 \cdot \delta_{ff} \cdot \frac{I_{fgr} + I_{fagr}}{N_{fgr} + N_{fagr}} \quad (10)$$

$$\lambda_{Gm} = \beta/365 \cdot \delta_{mm} \cdot \frac{I_{mgr}}{N_{mgr}} + \beta/365 \cdot \delta_{fm} \cdot \frac{I_{fgr} + I_{fagr}}{N_{fgr} + N_{fagr}} \quad (11)$$

$$\lambda_{Gfa} = \beta/365 \cdot \delta_{mf} \cdot \frac{I_{mgr}}{N_{mgr}} + \beta/365 \cdot \delta_{ff} \cdot \frac{I_{fgr} + I_{fagr}}{N_{fgr} + N_{fagr}} \quad (12)$$

### 332 **1.7.11.3 Probability of environmental infection ( $\lambda_E$ )**

333 Although CWD prion can be found in the soil and plants for a long time after excretion (Mathiason *et*  
 334 *al.* 2009; Miller *et al.* 2004; Plummer *et al.* 2018), Miller *et al.* (2004) reported a rapid rate of removal of the  
 335 amount of prions from the environment. Potapov *et al.* (2013) evaluated the impact of infected deer in the past,  
 336 concluding that the effect is weak and justifying the assumption of one year of pathogen survival in the  
 337 environment. Consequently, we calculated the probability of infection from an environmental source of prions  
 338 for a given deer at each step considering the sum of days that every excreting deer spent in the grid cell during  
 339 the previous 365 days. A food parameter related to food consumption ( $\varphi$ ) was also included:

$$\lambda_{Gf} = \beta'/365 \cdot \varphi_f \cdot \sum_{i=1}^{I_{365cell}} d_i \quad (13)$$

$$\lambda_{Gm} = \beta'/365 \cdot \varphi_f \cdot \sum_{i=1}^{I_{365cell}} d_i \quad (14)$$

$$\lambda_{Gfa} = \beta'/365 \cdot \varphi_{fa} \cdot \sum_{i=1}^{I_{gridcell-365\ days}} d_i \quad (15)$$

#### 1.7.11.4 Probability of carcass infection ( $\lambda_C$ )

The transmission from infectious deer carcasses to healthy deer has already been proven (Miller *et al.* 2004). Furthermore, the nutrient supply from the carcass to the soil leads to an increase in vegetation, entailing attraction effect for ungulates (Towne 2000; Walker *et al.* 2020). However, transmission from carcasses is usually overlooked in CWD epidemiological studies. We used the data collected by Jennelle *et al.* (2009) to estimate the probability of a given deer in a cell visiting a carcass at each step ( $\rho$ ), which was then combined with the probability of infection through contact with a carcass ( $\beta_C$ ) estimated by Miller *et al.* (2004). Consequently, the probability of infection by a carcass present in the grid cell at each step can be estimated. When combined with the number of carcasses present in the grid cell ( $N_{carcass}$ ), this leads to the probability of infection from carcasses at each step.

$$\lambda_C = \beta_C \cdot \rho \cdot N_{carcass} \quad (16)$$

#### 1.7.12 CWD Diffusion

The discretization of space into a grid signifies that the only way an individual in a cell other than the outbreak cell can become infected is through the arrival of an infected individual, either by dispersal or migration. Since individuals at the edge of a cell could come into contact and form groups with individuals from neighboring cells, thereby spreading the pathogen, a diffusion model is also added to the simulation. The spread rate is typically between 5 and 10 km per year from a focus of all infected individuals (Garlick *et al.* 2014; Xu, Merrill & Lewis 2022). In our grid, this would imply that from a cell where all individuals are infected, all 8 neighboring cells would also be infected within a year. The lower the prevalence, the lower the probability of neighboring cells becoming infected. For the diffusion model, we assume that the relationship between prevalence and the probability of diffusion is linear. Xu, Merrill and Lewis (2022) observed a correlation between the density of deer groups and the speed of spread, since a higher number of groups increases the likelihood of contact between them. Based on their calculations, we assumed that there is a linear relationship between the speed of expansion and the density of deer groups present, from 1.5 km/year (which would take approximately 5 years to spread to neighboring cells) for 1 group per 100 km<sup>2</sup>, to 7.5 km/year (which would take approximately 1 year) for 100 groups per 100 km<sup>2</sup>. Consequently, for each infected cell  $i$  (i.e., with at least

one infected individual) with  $Ngr$  deer groups inside, the probability ( $\beta dif$ ) of an individual in a neighboring cell  $z$  becoming infected at each step is calculated as follows:

$$\beta dif_z = prevalence_i \cdot (0.2 + 0.008 \cdot Ngr_i) / 365 \quad (17)$$

### 1.7.13 Droughts

Every year there is a probability  $droughtp$  that an interannual drought will begin, lasting between 365 and 1460 days (1 to 4 years; Miller *et al.* 2022). The drought covers the entire State of California resulting in an increase in mortality rates by 15% (Jackson *et al.* 2021; Schuyler, Dugger & Jackson 2018) and in the probability of wildfires by 40% (Littell *et al.* 2016; Madadgar *et al.* 2020). Furthermore, a 25% reduction in  $K$  is also considered.

### 1.7.14 Wildfires

Each cell has a probability  $firep$  of undergoing a wildfire during the summer. Similarly, each wildfire has a probability  $bigfirep$  of spreading the wildfire to the neighboring cells. When a cell burns out, it is assumed that the environmental prion load is removed by high temperatures (Lee 2023), signifying that  $\sum_{i=1}^{I_{365cell}} d_i = 0$  (see Equations 13-15).

Furthermore, an effect on  $K$  of the cell is considered (Bristow *et al.* 2020; Sparks *et al.* 2018). This effect is observed to decrease to a minimum during the first year after the fire (5%), increase over the second year due to the growth of low vegetation (190%), and stabilize from the third and fourth years (90%) before returning to its original value from the fifth year after the wildfire. The substantial reduction in  $K$  due to a fire initiates a dispersion process (see Equation 9), in which a large difference between  $N$  and  $K$  would result in the vast majority of deer in the cell fleeing ahead in a very short time (van Mantgem, Keeley & Witter 2015).

385 **Appendix 2: Model evaluation**

386 The ecological module of the model was evaluated through long-term population trends. In California,  
387 mule deer populations have been slightly declining for several decades (Loft & Bleich 2014; Webb 2013). To  
388 ensure that this pattern was reflected in the model, 20 iterations were conducted over a simulation of 50 years  
389 (18,250 steps) with a population of 10,000 deer in an area of 41,000 km<sup>2</sup> covering all mule deer ranges (summer,  
390 winter and year-round). These simulations were performed without initiating CWD outbreaks, in order to assess  
391 the population dynamics in the absence of the pathogen. The simulations showed a slight decline in the mule  
392 deer population over a 50-year period, with an average abundance of 8,370 individuals across the 20 iterations  
393 (ranging from 6,326 to 11,166) at the end of the simulation (see Figure S2). This outcome aligns with the  
394 observed population pattern of mule deer in California over the past few decades (Loft & Bleich 2014; Webb  
395 2013).

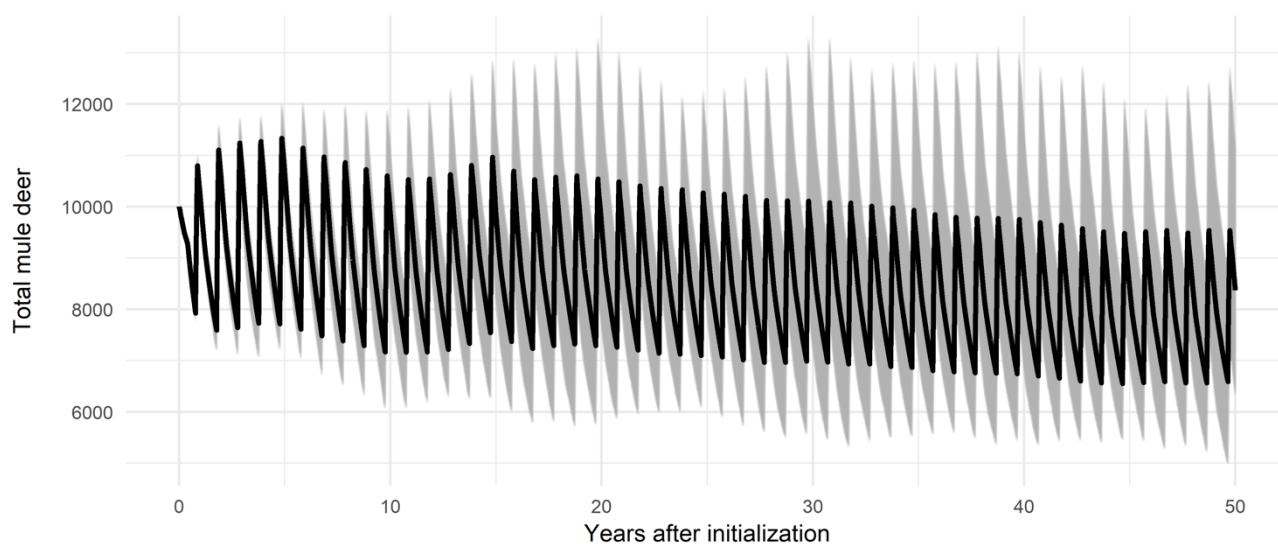

396 **Figure S2.** Evolution of the total number of mule deer over a 50-year simulation. The initial population was 10,000 deer  
397 in an area of 41,000 km<sup>2</sup>. The black line represents the average value across 20 iterations, while the gray shading  
398 represents the maximum and minimum values.  
399

400 The epidemiological module is more challenging to evaluate due to the lack of empirical data on the  
401 prevalence and distribution of the disease in California. Observed patterns in CWD dynamics indicate a higher  
402 prevalence in bucks (adult and old males) than in does (adult and old females) and yearlings (Edmunds *et al.*  
403 2016; Gear *et al.* 2006; Miller & Conner 2005; Osnas *et al.* 2009) and a spread velocity between 3.7 and 11

404 km/year (Garlick *et al.* 2014; Xu, Merrill & Lewis 2022). Consequently, the model's results were evaluated  
 405 through these patterns. To this end, 5 iterations of simulations lasting 7 years and 9 months (2,828 steps) were  
 406 conducted, with an initial modeled population of 46,160 mule deer, assumption based on publicly reported  
 407 statewide population estimates of 500,000–1,000,000 deer (WAFWA, 2025) and distributed across a 41,000  
 408 km<sup>2</sup> of simulation landscape according to the proportional distribution. The outbreaks were initiated on May 1<sup>st</sup>,  
 409 as this is the month when the first cases have been detected (Munk & Benedet 2024). This is 9 months after the  
 410 start of the simulation on August 1st, signifying 7 years of pathogen spread simulation. The outbreaks were  
 411 initiated in a non-migratory population to avoid the potential impact of migratory movements on the spatial  
 412 dynamics of the pathogen, since such movements could influence the spread rate or prevalence rates.

413 **Table S6.** Accumulated exposed mule deer and CWD prevalences by sex and age class over 7 years of pathogen presence  
 414 in an initial population of 46,160 mule deer in an area of 41,000 km<sup>2</sup>, with the outbreak initiating in a non-migratory  
 415 population. The values at the end of the simulation are shown for the 5 iterations.

| Iteration | Accumulated exposed<br>mule deer | Prevalence rates (whole simulation area) |        |           |        |
|-----------|----------------------------------|------------------------------------------|--------|-----------|--------|
|           |                                  | Bucks                                    | Does   | Yearlings | Fawns  |
| 1         | 2,884                            | 4.48 %                                   | 4.81 % | 3.78 %    | 4.78 % |
| 2         | 2,890                            | 8.71 %                                   | 8.52 % | 7.87 %    | 9.76 % |
| 3         | 2,143                            | 7.88 %                                   | 6.29 % | 5.71 %    | 7.23 % |
| 4         | 2,171                            | 3.54 %                                   | 3.20 % | 2.77 %    | 3.91 % |
| 5         | 2,289                            | 5.75 %                                   | 4.99 % | 4.62 %    | 5.98 % |

416 As a result, CWD exhibited an average spread of 50 km across the 10 iterations (ranging from 48 to 53  
 417 km) over the 7 years, resulting in an average spread rate of 7.1 km/year (ranging from 6.9 to 7.6 km/year). This  
 418 value is consistent with the expected rates observed in previous studies (3.7 to 11 km/year in Garlick *et al.* 2014;  
 419 7.3 km/year in Xu, Merrill & Lewis 2022). The prevalence of CWD was found to be higher in bucks than in  
 420 does and yearlings in all iterations, with a the exception of one iteration where the prevalence in does was slightly  
 421 higher (4.81% compared to 4.48%, see Table S6), as expected by previously reported values (Edmunds *et al.*  
 422 2016; Gear *et al.* 2006; Miller & Conner 2005). The prevalence of CWD in fawns was indeed higher than  
 423 expected based on previously reported values (Heisey *et al.* 2010; Osnas *et al.* 2009). However, the few data  
 424 regarding prevalence rates in fawns pertain to populations of a different species (white-tailed deer) in areas  
 425 where CWD is endemic, and the disease dynamics may differ.

426           Therefore, the demographic patterns of mule deer populations and the epidemiological patterns of CWD  
427 are shown to be within the expected range based on previous observational studies. Thus, the model's  
428 parameterization is shown to be reliable, lending credibility to the potential emergence of spatiotemporal  
429 patterns derived from the model.

430

## Appendix 3: Parameter optimization

Some of the parameters included in the modeling were estimated based on information derived from previous scientific research and reports published by the California Department of Fish and Wildlife (CDFW) and the California Department of Forestry and Fire Protection (CALFIRE). This appendix provides an account of the processes employed to obtain these parameters.

### 3.1. Hunting pressure ( $k_{hunt}$ , $\theta_{hunt}$ )

Hunting pressure was estimated based on mule deer population estimates and hunting statistics reports from CDFW. These reports are publicly available at <https://wildlife.ca.gov/Conservation/Mammals/Deer/Population> and <https://wildlife.ca.gov/Hunting/Deer>, respectively. In order to ascertain the distribution of hunting pressure by age and sex classes, the percentage of hunted mule deer corresponding to male yearlings, adult/old females (does), and adult/old males (bucks) was calculated based on the data included in the hunting statistics reports which included the information categorized by sex and age class, spanning from 2013 to 2017 (see Table S7).

**Table S7.** Hunting statistics for the entire state of California by sex and age class between the years 2013 and 2017.

| Year    | % Yearling males | % Does | % Males |
|---------|------------------|--------|---------|
| 2013    | 0.1              | 2.2    | 97.6    |
| 2014    | 0.1              | 2.0    | 97.9    |
| 2015    | 0.1              | 1.7    | 98.2    |
| 2016    | 0.1              | 1.6    | 98.3    |
| 2017    | 0.1              | 1.8    | 98.1    |
| Average | 0.1              | 1.9    | 98.0    |

The proportion of the mule deer population in each hunting area was derived from statewide abundance estimates of 500,000–1,000,000 deer (WAFWA, 2025) and the proportional distribution provided by CDFW (unpublished data). Sex- and age-class abundances (male yearlings, does, and adult bucks) were estimated using the proportions in Table S8 of the ODD protocol. Hunting pressure within each area was then calculated by multiplying the total number of individuals harvested by the proportional distribution and dividing this value by the abundance of the corresponding sex and age class (see Table S8). A Gamma distribution  $\Gamma(k, \theta)$  was employed to fit the hunting pressure for each sex and age class (see Figure S1). The hunting pressure in each



cell is calculated annually by sampling from each of these Gamma distributions, thereby introducing spatial and temporal stochasticity to the hunting pressure. The increases in mortality of old and adult male deer resulting from the calculated hunting pressure are consistent with data derived from studies conducted in other areas (Bishop *et al.* 2005; Forrester & Wittmer 2013).

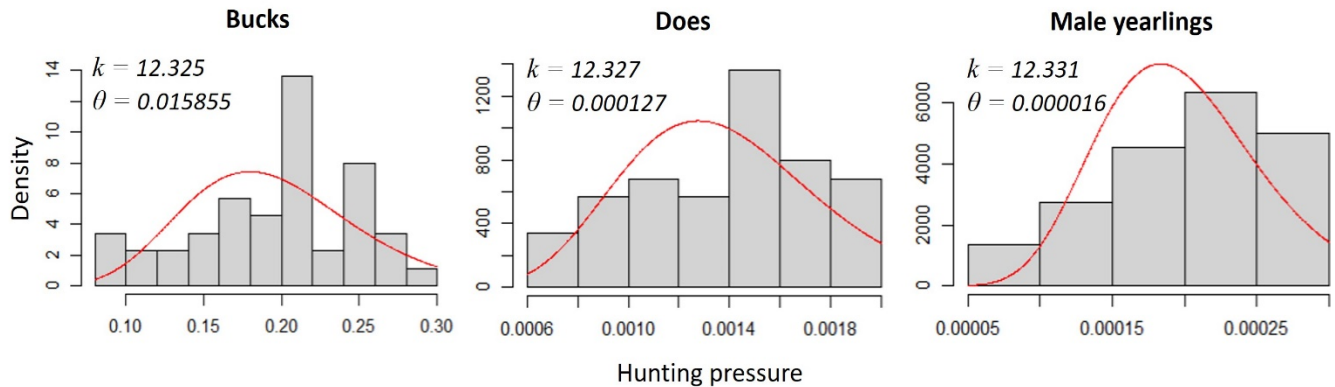

**Figure S1.** Gamma fitting to the mule deer hunting pressure values from the different game management areas of California.

### 3.2. Probability of visiting a carcass ( $\rho$ )

Jennelle *et al.* (2009) observed an average of 0.24 visits per day by white-tailed deer (*Odocoileus virginianus*) to carcasses of the same species. The study was conducted in an area of 544 km<sup>2</sup>, with a mean deer density of 14.5 individuals per km<sup>2</sup>. This would signify an approximate abundance of 7,888 deer throughout their study area. Given the aforementioned visit frequency, the probability of each deer visiting a single carcass in 544 km<sup>2</sup> would be  $0.24/7888 = 3.10 \cdot 10^{-5}$ . If the carcass were located in the more restricted space of 100 km<sup>2</sup> by a cell of the grid utilized in the model, the probability would be  $\rho = 3 \cdot 10^{-5} \cdot 544/100 = 1.6 \cdot 10^{-4}$ .

### 3.3. Carcass duration in the environment ( $\tau$ )

In the same study, Jennelle *et al.* (2009) evaluated the persistence of deer carcasses in the environment, concluding that season and scavenging pressure are the primary determinants. To estimate the persistence of carcasses ( $\tau$ ) for the four scheduled seasons, we fitted an exponential regression to the data collected in their research in each season (see Figure S2):

$$\tau_{PR \text{ and } R} = 33.78^{-0.27 \cdot scvg}$$

$$\tau_{EG} = 63.24^{-0.06 \cdot scvg}$$

$$\tau_{LG \text{ and } F} = 71.21^{-0.24 \cdot scvg}$$

Where  $PR$  is the pre-rut period,  $R$  is the rut period,  $EG$  is the early gestation period,  $LG$  is the late gestation period,  $F$  is the fawning period, and  $scvg$  is the number of scavenging species present.

**Table S8.** Hunting statistics for each mule deer game management area in California.

| Hunting Zone | Hunting pressure bucks | Hunting pressure Does | Hunting pressure male yearlings |
|--------------|------------------------|-----------------------|---------------------------------|
| A            | 0.2313560              | 0.0016447             | 0.0002361                       |
| B1           | 0.2507064              | 0.0017822             | 0.0002558                       |
| B2           | 0.2812340              | 0.0019992             | 0.0002870                       |
| B3           | 0.2580933              | 0.0018347             | 0.0002634                       |
| B4           | 0.2468463              | 0.0017548             | 0.0002519                       |
| B5           | 0.2477257              | 0.0017610             | 0.0002528                       |
| B6           | 0.2690059              | 0.0019123             | 0.0002745                       |
| C1           | 0.1726837              | 0.0012276             | 0.0001762                       |
| C2           | 0.2493943              | 0.0017729             | 0.0002545                       |
| C3           | 0.2503392              | 0.0017796             | 0.0002554                       |
| C4           | 0.1193453              | 0.0008484             | 0.0001218                       |
| D3           | 0.2148399              | 0.0015273             | 0.0002192                       |
| D4           | 0.2015636              | 0.0014329             | 0.0002057                       |
| D5           | 0.2114740              | 0.0015033             | 0.0002158                       |
| D6           | 0.1835822              | 0.0013051             | 0.0001873                       |
| D7           | 0.1950312              | 0.0013864             | 0.0001990                       |
| D8           | 0.2280419              | 0.0016211             | 0.0002327                       |
| D9           | 0.1464952              | 0.0010414             | 0.0001495                       |
| D10          | 0.2130056              | 0.0015142             | 0.0002174                       |
| D11          | 0.2608757              | 0.0018545             | 0.0002662                       |
| D12          | 0.1518071              | 0.0010792             | 0.0001549                       |
| D13          | 0.2628537              | 0.0018686             | 0.0002682                       |
| D14          | 0.2577548              | 0.0018323             | 0.0002630                       |
| D15          | 0.0912905              | 0.0006490             | 0.0000932                       |
| D16          | 0.2046046              | 0.0014545             | 0.0002088                       |
| D17          | 0.1128264              | 0.0008021             | 0.0001151                       |
| D19          | 0.2131657              | 0.0015154             | 0.0002175                       |
| X1           | 0.2180585              | 0.0015501             | 0.0002225                       |
| X2           | 0.2064371              | 0.0014675             | 0.0002107                       |
| X3a          | 0.1882369              | 0.0013381             | 0.0001921                       |

| Hunting Zone | Hunting pressure bucks | Hunting pressure Does | Hunting pressure male yearlings |
|--------------|------------------------|-----------------------|---------------------------------|
| X3b          | 0.2011210              | 0.0014297             | 0.0002052                       |
| X4           | 0.2025321              | 0.0014398             | 0.0002067                       |
| X5a          | 0.1912099              | 0.0013593             | 0.0001951                       |
| X5b          | 0.1631488              | 0.0011598             | 0.0001665                       |
| X6a          | 0.2171950              | 0.0015440             | 0.0002216                       |
| X6b          | 0.1639525              | 0.0011655             | 0.0001673                       |
| X7a          | 0.1669881              | 0.0011871             | 0.0001704                       |
| X7b          | 0.1679218              | 0.0011937             | 0.0001713                       |
| X8           | 0.2067651              | 0.0014699             | 0.0002110                       |
| X9a          | 0.1238557              | 0.0008805             | 0.0001264                       |
| X9b          | 0.0887682              | 0.0006310             | 0.0000906                       |
| X9c          | 0.1405992              | 0.0009995             | 0.0001435                       |
| X10          | 0.0872043              | 0.0006199             | 0.0000890                       |
| X12          | 0.1385755              | 0.0009851             | 0.0001414                       |

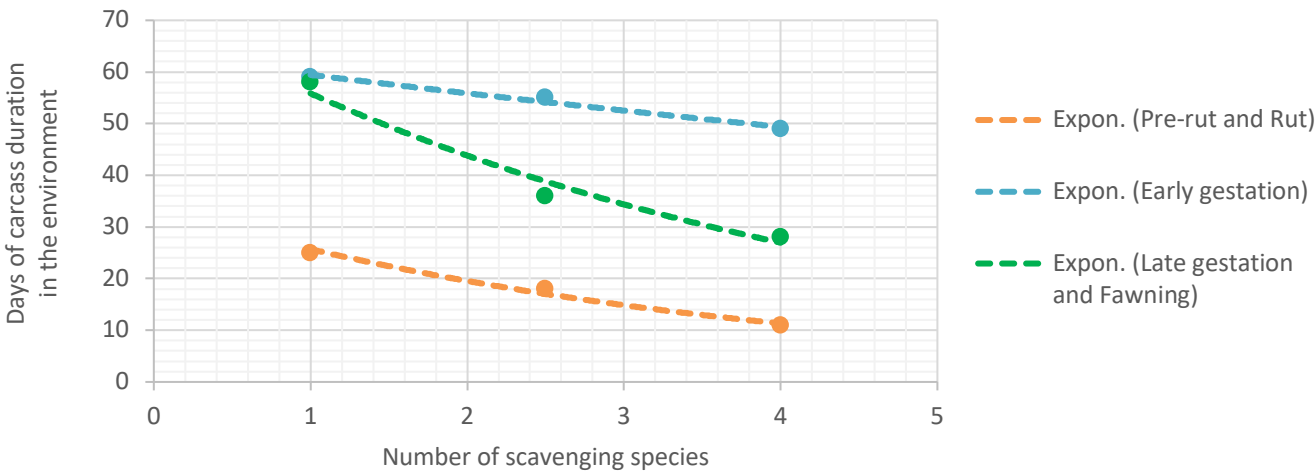

**Figure S2.** Exponential fitting to the data on carcass persistence in the environment collected by Jennelle *et al.* (2009).

The resulting persistence of a carcass in the environment for each season of the year and number of scavenging species included in the model is shown in Table S9.

478 **Table S9.** Duration of a deer carcass in the environment for each season and each number of scavenging species included  
479 in the model.

| Number of<br>scavenging species | Pre-rut and<br>Rut | Early<br>gestation | Late gestation<br>and fawning |
|---------------------------------|--------------------|--------------------|-------------------------------|
| 2                               | 20                 | 56                 | 44                            |
| 3                               | 15                 | 53                 | 34                            |
| 4                               | 11                 | 49                 | 27                            |
| 5                               | 9                  | 46                 | 21                            |
| 6                               | 7                  | 44                 | 17                            |

### 480 **3.4. Wildfire and big fire probability (*firep* and *bigfirep*)**

481 To estimate the probability of a cell burning each year (*firep*) and the probability that, given a fire, it  
482 becomes a large-scale fire (*bigfirep*), we utilized the CALFIRE incident database, which provides accurate  
483 information on fires that have occurred since 2013 to the present (available at <https://www.fire.ca.gov/incidents>).  
484 We excluded fires that burned an area smaller than 1 km<sup>2</sup> as they are not expected to have a significant effect on  
485 mule deer due to their mobility and home range (van Mantgem, Keeley & Witter 2015). The remaining fires  
486 with complete year information (from 2013 to 2023) were considered. The resulting total burned area was  
487 43,215.5 km<sup>2</sup> over 11 years, signifying an average of 3,928.7 km<sup>2</sup> burned each year. Given that each grid cell  
488 has an area of 100 km<sup>2</sup>, this would result in  $3,928.7/100 = 393$  cells burned each year. The majority of these  
489 fires occur within the mule deer distribution area in California (see Figure S3), which represents 25,580 cells in  
490 the grid used in the model. Consequently, if the number of cells expected to burn each year is divided by the  
491 total number of cells that can burn, a yearly fire probability in each cell is obtained, which is  $firep = 393/25,580$   
492  $= 0.015$ .

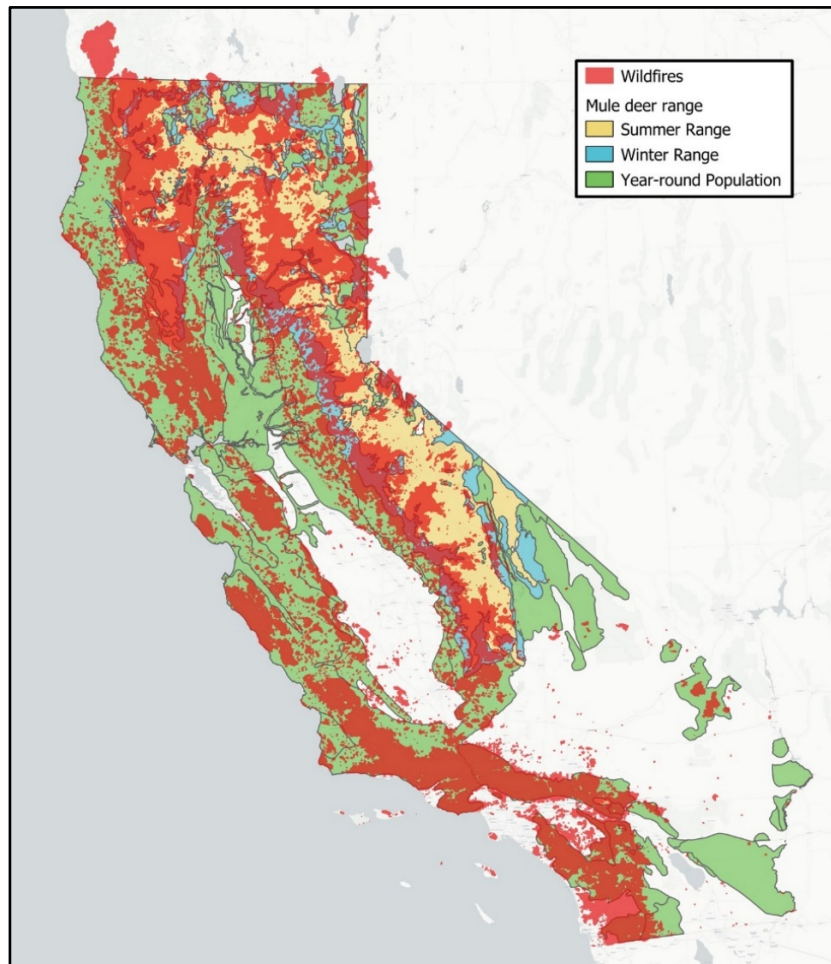

493

494 **Figure S3.** Area burned by historic wildfires in California, along with the distribution of mule deer. Compiled from data  
 495 provided by CALFIRE and CDFW.

496 To calculate the probability of a fire becoming a large fire that burns the 8 neighboring cells (*bigfirep*),  
 497 the number of fires larger than 800 km<sup>2</sup> (8 cells) was counted for the period from 2013 to 2023. A total of 12  
 498 fires were counted over 11 years, averaging 1.1 large fires per year. Given that 393 fires were calculated in cells  
 499 each year, the probability of each of them becoming a large fire and burning the 8 neighboring cells would be  
 500  $bigfirep = 1.1/393 = 0.0028$ .

501

502 **Appendix 4: Supplementary Figures**

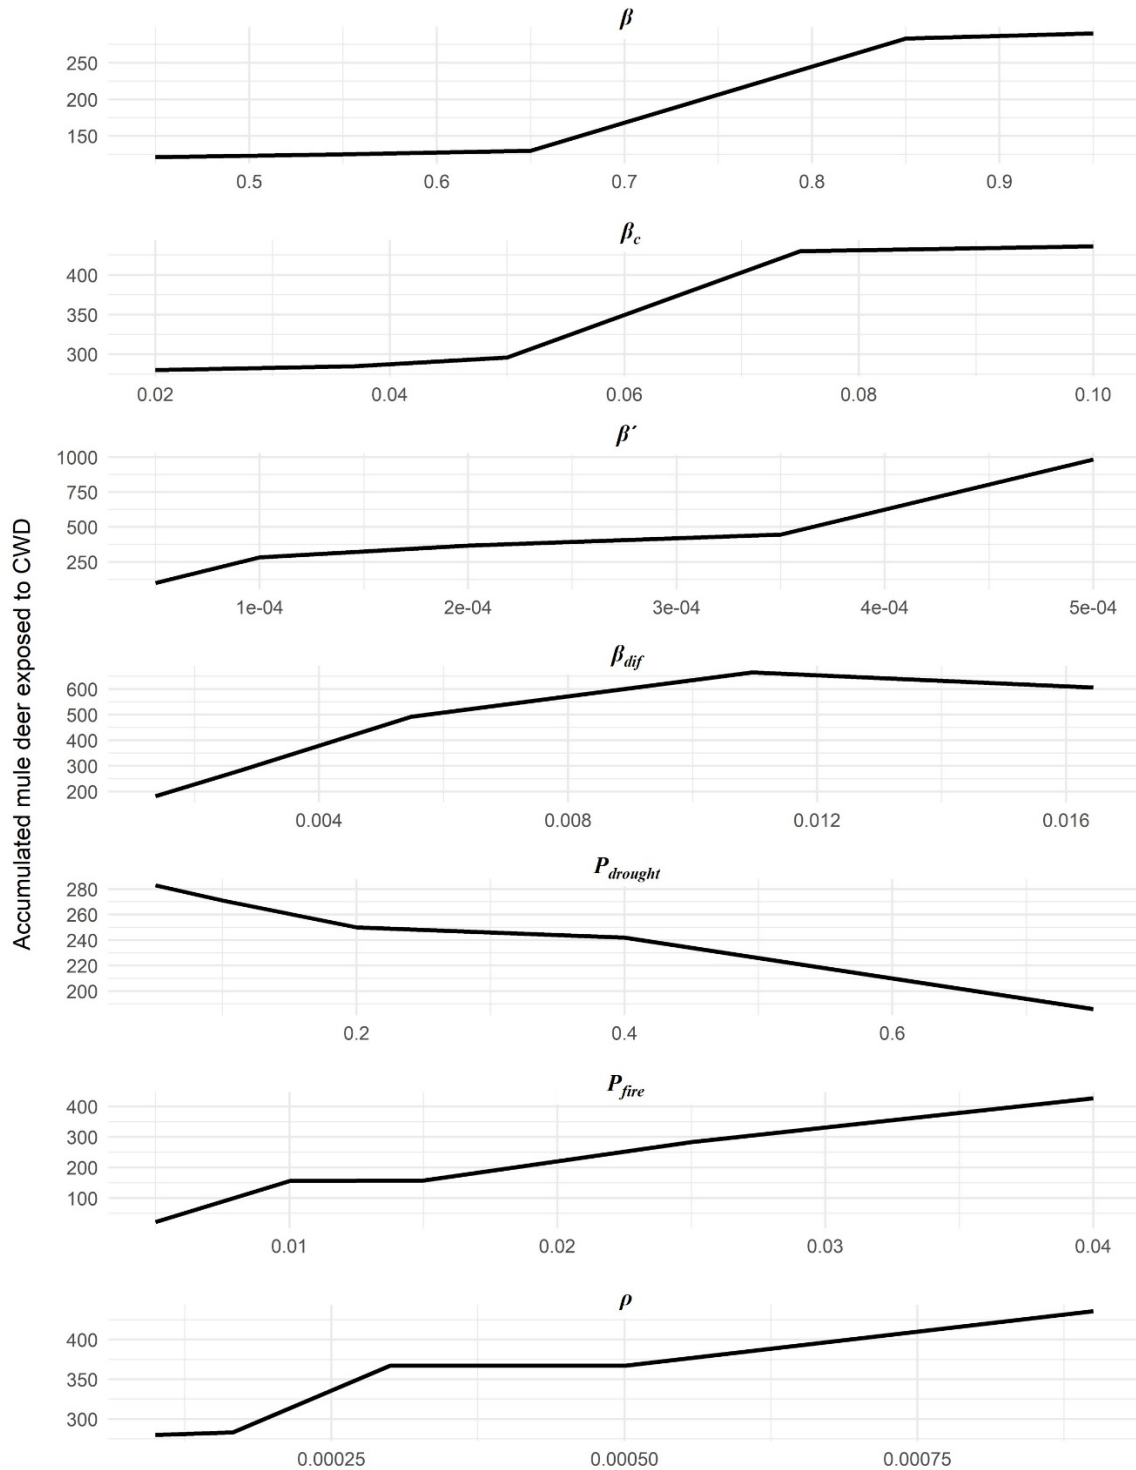

503

504 **Figure S4.** One-factor-at-a-time sensitivity analysis. The relationship between the output (the accumulated number of mule  
505 deer exposed to CWD at the end of the 7-year simulation following the CWD outbreak in an initial population of 10,000  
506 mule deer) and the parameters is displayed. The following parameters were considered: within-group transmission rate ( $\beta$ ),  
507 environmental transmission rate ( $\beta'$ ), carcass transmission rate ( $\beta_c$ ), diffusion rate ( $\beta_{dif}$ ) probability of encountering a carcass  
508 ( $\rho$ ), the probability of wildfires ( $P_{fire}$ ) and the probability of drought ( $P_{drought}$ ).

## 509   **References**

- 510   Ahlborn, G. & White, M. (2006) California Wildlife Habitat Relationships System: Mule Deer  
511       (*Odocoileus hemionus*). (ed. CDFW). California Interagency Wildlife Task Group,  
512       Sacramento.
- 513   Allen, M.L., Elbroch, L.M., Wilmers, C.C. & Wittmer, H.U. (2015) The comparative effects of large  
514       carnivores on the acquisition of carrion by scavengers. *Am Nat*, **185**, 822-833.  
515       10.1086/681004
- 516   Allen, M.L., Elbroch, L.M. & Wittmer, H.U. (2021) Scavenging by fishers in relation to season and  
517       other scavengers. *Ecological Research*, **36**, 353-359. 10.1111/1440-1703.12198
- 518   Almberg, E.S., Cross, P.C., Johnson, C.J., Heisey, D.M. & Richards, B.J. (2011) Modeling routes of  
519       chronic wasting disease transmission: environmental prion persistence promotes deer  
520       population decline and extinction. *PLoS One*, **6**, e19896. 10.1371/journal.pone.0019896
- 521   Baeten, L.A., Powers, B.E., Jewell, J.E., Spraker, T.R. & Miller, M.W. (2007) A Natural Case of  
522       Chronic Wasting Disease in a Free-ranging Moose (*Alces alces shirasi*). *Journal of Wildlife*  
523       *Diseases*, **43**, 309-314. 10.7589/0090-3558-43.2.309
- 524   Bauer, J.W., Logan, K.A., Sweanor, L.L., Boyce, W.M. & Jones, C.A. (2005) Scavenging Behavior  
525       in Puma. *The Southwestern Naturalist*, **50**, 466-471. 10.1894/0038-  
526       4909(2005)050[0466:Sbip]2.0.Co;2
- 527   Belsare, A.V., Gompper, M.E., Keller, B., Sumners, J., Hansen, L. & Millspaugh, J.J. (2020) An  
528       agent-based framework for improving wildlife disease surveillance: A case study of chronic  
529       wasting disease in Missouri white-tailed deer. *Ecol Modell*, **417**.  
530       10.1016/j.ecolmodel.2019.108919
- 531   Belsare, A.V. & Stewart, C.M. (2020) OvCWD: An agent-based modeling framework for informing  
532       chronic wasting disease management in white-tailed deer populations. *Ecological Solutions*  
533       *and Evidence*, **1**. 10.1002/2688-8319.12017
- 534   Bender, L.C. & Hoenes, B.D. (2018) Age-related fecundity of free-ranging mule deer *Odocoileus*  
535       *hemionus Cervidae* in south-central, New Mexico, USA. *Mammalia*, **82**, 124-132.  
536       10.1515/mammalia-2016-0166
- 537   Benestad, S.L., Mitchell, G., Simmons, M., Ytrehus, B. & Vikøren, T. (2016) First case of chronic  
538       wasting disease in Europe in a Norwegian free-ranging reindeer. *Veterinary Research*, **47**, 88.  
539       10.1186/s13567-016-0375-4
- 540   Bergman, E.J., Doherty, P.F., White, G.C. & Holland, A.A. (2015) Density dependence in mule deer:  
541       a review of evidence. *Wildlife Biology*, **21**, 18-29. 10.2981/wlb.00012
- 542   Bishop, C.J., Unsworth, J.W., Garton, E.O. & Ransom (2005) Mule Deer Survival among Adjacent  
543       Populations in Southwest Idaho. *Journal of Wildlife Management*, **69**, 311-321.  
544       10.2193/0022-541x(2005)069<0311:Mdsaap>2.0.Co;2
- 545   Bishop, C.J., White, G.C., Freddy, D.J., Watkins, B.E. & Stephenson, T.R. (2010) Effect of  
546       Enhanced Nutrition on Mule Deer Population Rate of Change. *Wildlife Monographs*, **172**, 1-  
547       28. 10.2193/2008-107
- 548   Bristow, K.D., Harding, L.E., Lucas, R.W. & McCall, T.C. (2020) Influence of fire severity and  
549       vegetation treatments on mule deer (*Odocoileus hemionus*) winter habitat use on the Kaibab

550 Plateau, Arizona. *Animal Production Science*, **60**, 1292-1302.  
551 <https://doi.org/10.1071/AN19373>

552 California Department of Fish and Wildlife (2024) California's Deer Population Estimates [accessed  
553 10/05/2024]. Available at <https://wildlife.ca.gov/Conservation/Mammals/Deer/Population>

554 D'Eon, R.G. & Serrouya, R. (2005) Mule Deer Seasonal Movements and Multiscale Resource  
555 Selection Using Global Positioning System Radiotelemetry. *Journal of Mammalogy*, **86**, 736-  
556 744. 10.1644/1545-1542(2005)086[0736:Mds mam]2.0.Co;2

557 DeVivo, M.T., Edmunds, D.R., Kauffman, M.J., Schumaker, B.A., Binfet, J., Kreeger, T.J., Richards,  
558 B.J., Schatzl, H.M. & Cornish, T.E. (2017) Endemic chronic wasting disease causes mule  
559 deer population decline in Wyoming. *PLoS One*, **12**, e0186512.  
560 10.1371/journal.pone.0186512

561 Diefenbach, D.R., Long, E.S., Rosenberry, C.S., Wallingford, B.D. & Smith, D.R. (2008) Modeling  
562 Distribution of Dispersal Distances in Male White-Tailed Deer. *Journal of Wildlife*  
563 *Management*, **72**, 1296-1303. 10.2193/2007-436

564 Edmunds, D.R., Kauffman, M.J., Schumaker, B.A., Lindzey, F.G., Cook, W.E., Kreeger, T.J.,  
565 Grogan, R.G. & Cornish, T.E. (2016) Chronic Wasting Disease Drives Population Decline of  
566 White-Tailed Deer. *PLoS One*, **11**, e0161127. 10.1371/journal.pone.0161127

567 Escobar, L.E., Pritzkow, S., Winter, S.N., Grear, D.A., Kirchgessner, M.S., Dominguez-Villegas, E.,  
568 Machado, G., Townsend Peterson, A. & Soto, C. (2020) The ecology of chronic wasting  
569 disease in wildlife. *Biol Rev Camb Philos Soc*, **95**, 393-408. 10.1111/brv.12568

570 Farnsworth, M.L., Hoeting, J.A., Hobbs, N.T. & Miller, M.W. (2006) Linking Chronic Wasting  
571 Disease To Mule Deer Movement Scales: A Hierarchical Bayesian Approach. *Ecological*  
572 *Applications*, **16**, 1026-1036. 10.1890/1051-0761(2006)016[1026:Lc wdtm]2.0.Co;2

573 Forrester, T.D. & Wittmer, H.U. (2013) A review of the population dynamics of mule deer and  
574 black-tailed deer *Odocoileus hemionus* in North America. *Mammal Review*, **43**, 292-308.  
575 10.1111/mam.12002

576 Furnas, B.J., Landers, R.H., Hill, S., Itoga, S.S. & Sacks, B.N. (2018) Integrated modeling to  
577 estimate population size and composition of mule deer. *The Journal of Wildlife Management*,  
578 **82**, 1429-1441. 10.1002/jwmg.21507

579 Garlick, M.J., Powell, J.A., Hooten, M.B. & MacFarlane, L.R. (2014) Homogenization, sex, and  
580 differential motility predict spread of chronic wasting disease in mule deer in southern Utah. *J*  
581 *Math Biol*, **69**, 369-399. 10.1007/s00285-013-0709-z

582 Grear, D.A., Samuel, M.D., Langenberg, J.A. & Keane, D. (2006) Demographic Patterns and Harvest  
583 Vulnerability of Chronic Wasting Disease Infected White-Tailed Deer in Wisconsin. *Journal*  
584 *of Wildlife Management*, **70**, 546-553. 10.2193/0022-541x(2006)70[546:Dpahvo]2.0.Co;2

585 Grear, D.A., Samuel, M.D., Scribner, K.T., Weckworth, B.V. & Langenberg, J.A. (2010) Influence  
586 of genetic relatedness and spatial proximity on chronic wasting disease infection among  
587 female white-tailed deer. *Journal of Applied Ecology*, **47**, 532-540. 10.1111/j.1365-  
588 2664.2010.01813.x

589 Grimm, V., Berger, U., DeAngelis, D.L., Polhill, J.G., Giske, J. & Railsback, S.F. (2010) The ODD  
590 protocol: A review and first update. *Ecological Modelling*, **221**, 2760-2768.  
591 10.1016/j.ecolmodel.2010.08.019



592 Grimm, V., Railsback, S.F., Vincenot, C.E., Berger, U., Gallagher, C., DeAngelis, D.L., Edmonds,  
593 B., Ge, J., Giske, J., Groeneveld, J., Johnston, A.S.A., Milles, A., Nabe-Nielsen, J., Polhill,  
594 J.G., Radchuk, V., Rohwäder, M.-S., Stillman, R.A., Thiele, J.C. & Ayllón, D. (2020) The  
595 ODD Protocol for Describing Agent-Based and Other Simulation Models: A Second Update  
596 to Improve Clarity, Replication, and Structural Realism. *Journal of Artificial Societies and*  
597 *Social Simulation*, **23**. 10.18564/jasss.4259

598 Grimm, V., Revilla, E., Berger, U., Jeltsch, F., Mooij, W.M., Railsback, S.F., Thulke, H.H., Weiner,  
599 J., Wiegand, T. & DeAngelis, D.L. (2005) Pattern-oriented modeling of agent-based complex  
600 systems: lessons from ecology. *Science*, **310**, 987-991. 10.1126/science.1116681

601 Gross, J.E. & Miller, M.W. (2001) Chronic Wasting Disease in Mule Deer: Disease Dynamics and  
602 Control. *The Journal of Wildlife Management*, **65**. 10.2307/3802899

603 Habib, T.J., Merrill, E.H., Pybus, M.J. & Coltman, D.W. (2011) Modelling landscape effects on  
604 density–contact rate relationships of deer in eastern Alberta: Implications for chronic wasting  
605 disease. *Ecological Modelling*, **222**, 2722-2732. 10.1016/j.ecolmodel.2011.05.007

606 Haley, N.J. & Hoover, E.A. (2015) Chronic wasting disease of cervids: current knowledge and future  
607 perspectives. *Annu Rev Anim Biosci*, **3**, 305-325. 10.1146/annurev-animal-022114-111001

608 Haley, N.J., Mathiason, C.K., Carver, S., Telling, G.C., Zabel, M.D. & Hoover, E.A. (2012)  
609 Sensitivity of protein misfolding cyclic amplification versus immunohistochemistry in ante-  
610 mortem detection of chronic wasting disease. *J Gen Virol*, **93**, 1141-1150.  
611 10.1099/vir.0.039073-0

612 Hamlin, K.L. & Mackie, R.J. (1989) Mule deer in the Missouri River Breaks, Montana: a study of  
613 population dynamics in a fluctuating environment.

614 Heisey, D.M., Osnas, E.E., Cross, P.C., Joly, D.O., Langenberg, J.A. & Miller, M.W. (2010) Linking  
615 process to pattern: estimating spatiotemporal dynamics of a wildlife epidemic from cross-  
616 sectional data. *Ecological Monographs*, **80**, 221-240. 10.1890/09-0052.1

617 Jackson, N.J., Stewart, K.M., Wisdom, M.J., Clark, D.A. & Rowland, M.M. (2021) Demographic  
618 performance of a large herbivore: effects of winter nutrition and weather. *Ecosphere*, **12**.  
619 10.1002/ecs2.3328

620 Jennelle, C.S., Henaux, V., Wasserberg, G., Thiagarajan, B., Rolley, R.E. & Samuel, M.D. (2014)  
621 Transmission of chronic wasting disease in Wisconsin white-tailed deer: implications for  
622 disease spread and management. *PLoS One*, **9**, e91043. 10.1371/journal.pone.0091043

623 Jennelle, C.S., Samuel, M.D., Nolden, C.A. & Berkley, E.A. (2009) Deer Carcass Decomposition  
624 and Potential Scavenger Exposure to Chronic Wasting Disease. *Journal of Wildlife*  
625 *Management*, **73**, 655-662. 10.2193/2008-282

626 Johnson, C.J., Herbst, A., Duque-Velasquez, C., Vanderloo, J.P., Bochsler, P., Chappell, R. &  
627 McKenzie, D. (2011) Prion protein polymorphisms affect chronic wasting disease  
628 progression. *PLoS One*, **6**, e17450. 10.1371/journal.pone.0017450

629 Johnson, R.T. (2005) Prion diseases. *The Lancet Neurology*, **4**, 635-642. 10.1016/S1474-  
630 4422(05)70192-7

631 Kim, T.-Y., Shon, H.-J., Joo, Y.-S., Mun, U.-K., Kang, K.-S. & Lee, Y.-S. (2005) Additional Cases  
632 of Chronic Wasting Disease in Imported Deer in Korea. *Journal of Veterinary Medical*  
633 *Science*, **67**, 753-759. 10.1292/jvms.67.753

634 Kjaer, L.J. (2010) Individual-based modeling of white-tailed deer (*Odocoileus virginianus*)  
635 movements and epizootiology. Southern Illinois University Carbondale Carbondale, IL.

636 Lane-deGraaf, K.E., Kennedy, R.C., Arifin, S.M., Madey, G.R., Fuentes, A. & Hollocher, H. (2013)  
637 A test of agent-based models as a tool for predicting patterns of pathogen transmission in  
638 complex landscapes. *BMC Ecol*, **13**, 35. 10.1186/1472-6785-13-35

639 Lee, Y.-C.J. (2023) Prions: a threat to health security and the need for effective medical  
640 countermeasures. *Global Health Journal*, **7**, 43-48. 10.1016/j.glohj.2023.02.004

641 Lendrum, P.E., Anderson, C.R., Jr., Monteith, K.L., Jenks, J.A. & Bowyer, R.T. (2013) Migrating  
642 mule deer: effects of anthropogenically altered landscapes. *PLoS One*, **8**, e64548.  
643 10.1371/journal.pone.0064548

644 Littell, J.S., Peterson, D.L., Riley, K.L., Liu, Y. & Luce, C.H. (2016) A review of the relationships  
645 between drought and forest fire in the United States. *Global Change Biology*, **22**, 2353-2369.  
646 <https://doi.org/10.1111/gcb.13275>

647 Loft, E.R. & Bleich, V.C. (2014) History of the conservation of critical deer ranges in California:  
648 concepts and terminology. *California Fish and Game*, **100**, 451-472.

649 Mackie, R.J. (1998) *Ecology and management of mule deer and white-tailed deer in Montana*.  
650 Montana Fish, Wildlife, and Parks, Wildlife Division.

651 Madadgar, S., Sadegh, M., Chiang, F., Ragno, E. & AghaKouchak, A. (2020) Quantifying increased  
652 fire risk in California in response to different levels of warming and drying. *Stochastic*  
653 *Environmental Research and Risk Assessment*, **34**, 2023-2031.

654 Mathiason, C.K., Hays, S.A., Powers, J., Hayes-Klug, J., Langenberg, J., Dahmes, S.J., Osborn,  
655 D.A., Miller, K.V., Warren, R.J., Mason, G.L. & Hoover, E.A. (2009) Infectious prions in  
656 pre-clinical deer and transmission of chronic wasting disease solely by environmental  
657 exposure. *PLoS One*, **4**, e5916. 10.1371/journal.pone.0005916

658 McCallum, H. (2016) Models for managing wildlife disease. *Parasitology*, **143**, 805-820.  
659 10.1017/S0031182015000980

660 Mejia-Salazar, M.F., Goldizen, A.W., Menz, C.S., Dwyer, R.G., Blomberg, S.P., Waldner, C.L.,  
661 Cullingham, C.I. & Bollinger, T.K. (2017) Mule deer spatial association patterns and  
662 potential implications for transmission of an epizootic disease. *PLoS One*, **12**, e0175385.  
663 10.1371/journal.pone.0175385

664 Mejia Salazar, M.F. (2017) Social dynamics among mule deer and how they visit various  
665 environmental areas: implications for chronic wasting disease transmission. University of  
666 Saskatchewan.

667 Mejia Salazar, M.F., Waldner, C., Stookey, J. & Bollinger, T.K. (2016) Infectious Disease and  
668 Grouping Patterns in Mule Deer. *PLoS One*, **11**, e0150830. 10.1371/journal.pone.0150830

669 Miller, D.L., Alonzo, M., Meerdink, S.K., Allen, M.A., Tague, C.L., Roberts, D.A. & McFadden,  
670 J.P. (2022) Seasonal and interannual drought responses of vegetation in a California  
671 urbanized area measured using complementary remote sensing indices. *ISPRS Journal of*  
672 *Photogrammetry and Remote Sensing*, **183**, 178-195.  
673 <https://doi.org/10.1016/j.isprsjprs.2021.11.002>

674 Miller, M.W. & Conner, M.M. (2005) Epidemiology of Chronic Wasting Disease in free-ranging  
675 mule deer: spatial, temporal and demographic influences on observed prevalence patterns.  
676 *Journal of Wildlife Diseases*, **41**, 275-290. 10.7589/0090-3558-41.2.275

677 Miller, M.W., Hobbs, N.T. & Tavener, S.J. (2006) Dynamics of Prion Disease Transmission in Mule  
678 Deer. *Ecological Applications*, **16**, 2208-2214. 10.1890/1051-  
679 0761(2006)016[2208:Dopdti]2.0.Co;2

680 Miller, M.W., Swanson, H.M., Wolfe, L.L., Quartarone, F.G., Huwer, S.L., Southwick, C.H. &  
681 Lukacs, P.M. (2008) Lions and prions and deer demise. *PLoS One*, **3**, e4019.  
682 10.1371/journal.pone.0004019

683 Miller, M.W. & Williams, E.S. (2003) Prion disease: horizontal prion transmission in mule deer.  
684 *Nature*, **425**, 35-36. 10.1038/425035a

685 Miller, M.W., Williams, E.S., Hobbs, N.T. & Wolfe, L.L. (2004) Environmental sources of prion  
686 transmission in mule deer. *Emerg Infect Dis*, **10**, 1003-1006. 10.3201/eid1006.040010

687 Monteith, K.L., Bleich, V.C., Stephenson, T.R., Pierce, B.M., Conner, M.M., Kie, J.G. & Bowyer,  
688 R.T. (2014) Life-history characteristics of mule deer: Effects of nutrition in a variable  
689 environment. *Wildlife Monographs*, **186**, 1-62. 10.1002/wmon.1011

690 Monteith, K.L., Bleich, V.C., Stephenson, T.R., Pierce, B.M., Conner, M.M., Klaver, R.W. &  
691 Bowyer, R.T. (2011) Timing of seasonal migration in mule deer: effects of climate, plant  
692 phenology, and life-history characteristics. *Ecosphere*, **2**. 10.1890/es10-00096.1

693 Monteith, K.L., Hayes, M.M., Kauffman, M.J., Copeland, H.E. & Sawyer, H. (2018) Functional  
694 attributes of ungulate migration: landscape features facilitate movement and access to forage.  
695 *Ecol Appl*, **28**, 2153-2164. 10.1002/eap.1803

696 Mount, J., Escriva-Bou, A. & Sencan, G. (2021) Droughts in California. *Public Policy Institute of*  
697 *California website, April. Accessed August, 10, 2022.*

698 Munk, B. & Benedet, J. (2024) Chronic Wasting Disease Confirmed in California Deer Population—  
699 CDFW Urges Hunters to be Vigilant and Participate in Disease Surveillance Efforts. *CDFW*  
700 *News*. California Department of Fish and Wildlife, Sacramento, CA.

701 Muñoz, A.-R., Jiménez-Valverde, A., Márquez, A.L., Moleón, M. & Real, R. (2015) Environmental  
702 favourability as a cost-efficient tool to estimate carrying capacity. *Diversity and*  
703 *Distributions*, **21**, 1388-1400. <https://doi.org/10.1111/ddi.12352>

704 Myserud, A. & Edmunds, D.R. (2019) A review of chronic wasting disease in North America with  
705 implications for Europe. *European Journal of Wildlife Research*, **65**. 10.1007/s10344-019-  
706 1260-z

707 National Wildlife Health Center (2024) Expanding Distribution of Chronic Wasting Disease  
708 [accessed May 2024]. Available at [https://www.usgs.gov/centers/nwhc/science/expanding-](https://www.usgs.gov/centers/nwhc/science/expanding-distribution-chronic-wasting-disease)  
709 [distribution-chronic-wasting-disease](https://www.usgs.gov/centers/nwhc/science/expanding-distribution-chronic-wasting-disease)

710 Osnas, E.E., Heisey, D.M., Rolley, R.E. & Samuel, M.D. (2009) Spatial and temporal patterns of  
711 chronic wasting disease: fine-scale mapping of a wildlife epidemic in Wisconsin. *Ecol Appl*,  
712 **19**, 1311-1322. 10.1890/08-0578.1

713 Otero, A., Velasquez, C.D., Aiken, J. & McKenzie, D. (2021) Chronic wasting disease: a cervid  
714 prion infection looming to spillover. *Vet Res*, **52**, 115. 10.1186/s13567-021-00986-y

715 Plummer, I.H., Johnson, C.J., Chesney, A.R., Pedersen, J.A. & Samuel, M.D. (2018) Mineral licks as  
716 environmental reservoirs of chronic wasting disease prions. *PLoS One*, **13**, e0196745.  
717 10.1371/journal.pone.0196745

718 Plummer, I.H., Wright, S.D., Johnson, C.J., Pedersen, J.A. & Samuel, M.D. (2017) Temporal  
719 patterns of chronic wasting disease prion excretion in three cervid species. *J Gen Virol*, **98**,  
720 1932-1942. 10.1099/jgv.0.000845

721 Potapov, A., Merrill, E., Pybus, M., Coltman, D.W. & Lewis, M.A. (2013) Chronic wasting disease:  
722 Possible transmission mechanisms in deer. *Ecological Modelling*, **250**, 244-257.  
723 10.1016/j.ecolmodel.2012.11.012

724 Potapov, A., Merrill, E., Pybus, M. & Lewis, M.A. (2016) Chronic Wasting Disease: Transmission  
725 Mechanisms and the Possibility of Harvest Management. *PLoS One*, **11**, e0151039.  
726 10.1371/journal.pone.0151039

727 Rittenhouse, C.D., Mong, T.W. & Hart, T. (2015) Weather conditions associated with autumn  
728 migration by mule deer in Wyoming. *PeerJ*, **3**, e1045. 10.7717/peerj.1045

729 Robinette, W.L. (1966) Mule Deer Home Range and Dispersal in Utah. *The Journal of Wildlife*  
730 *Management*, **30**. 10.2307/3797822

731 Schuyler, E.M., Dugger, K.M. & Jackson, D.H. (2018) Effects of distribution, behavior, and climate  
732 on mule deer survival. *The Journal of Wildlife Management*, **83**, 89-99. 10.1002/jwmg.21558

733 Shellard, A. & Mayor, R. (2020) Rules of collective migration: from the wildebeest to the neural  
734 crest. *Philosophical Transactions of the Royal Society B: Biological Sciences*, **375**, 20190387.  
735 doi:10.1098/rstb.2019.0387

736 Sparks, A.M., Kolden, C.A., Smith, A.M.S., Boschetti, L., Johnson, D.M. & Cochrane, M.A. (2018)  
737 Fire intensity impacts on post-fire temperate coniferous forest net primary productivity.  
738 *Biogeosciences*, **15**, 1173-1183. 10.5194/bg-15-1173-2018

739 Spraker, T., Miller, M., Williams, E., Getzy, D., Adrian, W., Schoonveld, G., Spowart, R., O'Rourke,  
740 K.I., Miller, J. & Merz, P. (1997) Spongiform encephalopathy in free-ranging mule deer  
741 (*Odocoileus hemionus*), white-tailed deer (*Odocoileus virginianus*) and Rocky Mountain elk  
742 (*Cervus elaphus nelsoni*) in northcentral Colorado. *Journal of Wildlife Diseases*, **33**, 1-6.  
743 10.7589/0090-3558-33.1.1

744 Stanke, H., Jaffe, N., Xie, Y. & Ligmann-Zielinska, A. (2018) An agent based modelling approach to  
745 estimate dispersal potential of white tailed deer: Implications for Chronic Wasting Disease.  
746 *GEO 869 Geosimulation* pp. 11. Michigan State University, Michigan.

747 Storm, D.J., Samuel, M.D., Rolley, R.E., Shelton, P., Keuler, N.S., Richards, B.J. & Van Deelen,  
748 T.R. (2013) Deer density and disease prevalence influence transmission of chronic wasting  
749 disease in white-tailed deer. *Ecosphere*, **4**, 1-14. 10.1890/es12-00141.1

750 Taillandier, P., Gaudou, B., Grignard, A., Huynh, Q.-N., Marilleau, N., Caillou, P., Philippon, D. &  
751 Drogoul, A. (2018) Building, composing and experimenting complex spatial models with the  
752 GAMA platform. *GeoInformatica*, **23**, 299-322. 10.1007/s10707-018-00339-6

753 Tamguney, G., Miller, M.W., Wolfe, L.L., Sirochman, T.M., Glidden, D.V., Palmer, C., Lemus, A.,  
754 DeArmond, S.J. & Prusiner, S.B. (2009) Asymptomatic deer excrete infectious prions in  
755 faeces. *Nature*, **461**, 529-532. 10.1038/nature08289

756 Taylor, T.J. (1996) Condition and reproductive performance of female mule deer in central Sierra  
757 Nevada. *California Fish and Game*, **82**, 122-132.

758 Towne, E.G. (2000) Prairie vegetation and soil nutrient responses to ungulate carcasses. *Oecologia*,  
759 **122**, 232-239. 10.1007/PL00008851

- 760 Valente, A.M., Acevedo, P., Figueiredo, A.M., Fonseca, C. & Torres, R.T. (2020) Overabundant  
761 wild ungulate populations in Europe: management with consideration of socio-ecological  
762 consequences. *Mammal Review*, **50**, 353-366. 10.1111/mam.12202
- 763 van de Kerk, M., Larsen, R.T., Olson, D.D., Hersey, K.R. & McMillan, B.R. (2021) Variation in  
764 movement patterns of mule deer: have we oversimplified migration? *Mov Ecol*, **9**, 44.  
765 10.1186/s40462-021-00281-7
- 766 van Mantgem, E.F., Keeley, J.E. & Witter, M. (2015) Faunal Responses to Fire in Chaparral and  
767 Sage Scrub in California, USA. *Fire Ecology*, **11**, 128-148. 10.4996/fireecology.1103128
- 768 Walker, M.A., Uribasterra, M., Asher, V., Ponciano, J.M., Getz, W.M., Ryan, S.J. & Blackburn, J.K.  
769 (2020) Ungulate use of locally infectious zones in a re-emerging anthrax risk area. *R Soc*  
770 *Open Sci*, **7**, 200246. 10.1098/rsos.200246
- 771 Wasserberg, G., Osnas, E.E., Rolley, R.E. & Samuel, M.D. (2009) Host culling as an adaptive  
772 management tool for chronic wasting disease in white-tailed deer: a modelling study. *J Appl*  
773 *Ecol*, **46**, 457-466. 10.1111/j.1365-2664.2008.01576.x
- 774 Webb, G.K. (2013) Deer herd management using the internet: a comparative study of California  
775 targeted by data mining the internet. *Issues in Information Systems*, 156.
- 776 White, G.C., Freddy, D.J., Gill, R.B. & Ellenberger, J.H. (2001) Effect of Adult Sex Ratio on Mule  
777 Deer and Elk Productivity in Colorado. *The Journal of Wildlife Management*, **65**.  
778 10.2307/3803107
- 779 Williams, E.S. (2005) Chronic wasting disease. *Vet Pathol*, **42**, 530-549. 10.1354/vp.42-5-530
- 780 Williams, E.S. & Young, S. (1980) Chronic wasting disease of captive mule deer: a spongiform  
781 encephalopathy. *Journal of Wildlife Diseases*, **16**, 89-98. 10.7589/0090-3558-16.1.89
- 782 Winter, S.N. & Escobar, L.E. (2020) Chronic Wasting Disease Modeling: An Overview. *J Wildl Dis*,  
783 **56**, 741-758. 10.7589/2019-08-213
- 784 Wood, A.K., Hamlin, K.L., Mackie, R.J. & Montana. Wildlife, D. (1989) *Ecology of sympatric*  
785 *populations of mule deer and white-tailed deer in a prairie environment*. Wildlife Division,  
786 Montana Dept. of Fish, Wildlife & Parks, [S.l.].
- 787 Xu, J., Merrill, E.H. & Lewis, M.A. (2022) Spreading speed of chronic wasting disease across deer  
788 groups with overlapping home ranges. *J Theor Biol*, **547**, 111135. 10.1016/j.jtbi.2022.111135
- 789 Zipf, G.K. (1949) *Human behavior and the principle of least effort*. Addison-Wesley Press, Oxford,  
790 England.
